# Supplementary material for: RstA, a two-component response regulator, plays important roles in multiple virulence-associated processes in enterohemorrhagic Escherichia coli O157:H7
Source: Gut Pathog. 2019 Nov 1;11:53. doi: 10.1186/s13099-019-0335-4 (PMC6824119; doi:10.1186/s13099-019-0335-4)
Supplement: Supplementary file 2 — Additional file 2: Excel file S1. Down-regulated genes in the ΔrstA mutant compared with EHEC O157:H7 wild type strain, Excel file S2. Up-regulated genes in the ΔrstA mutant compared with EHEC O157:H7 wild type strain. Excel file S3. Differently expressed LEE genes in the ΔrstA mutant compared with EHEC O157:H7 wild type strain, Excel file S4. Differently expressed acid tolerance genes in the ΔrstA mutant compared with EHEC O157:H7 wild type strain, Excel file S5. Differently expressed diguanylate cyclases and phosphodiesterases genes in the ΔrstA mutant compared with EHEC O157:H7 wild type strain, Excel file S6. Differently expressed Stxs and Nle genes in the ΔrstA mutant compared with EHEC O157:H7 wild type strain, Excel file S7. Differently expressed regulatory genes in the ΔrstA mutant compared with EHEC O157:H7 wild type strain. [file 13099_2019_335_MOESM2_ESM.xlsx]

## Sheet: Excel file S1
Supplementary Table 5. Up-regulated and down-regulated genes in EHEC O157:H7 rstA mutant
Down-regulated genes
old_locus_tag	WT1_FPKM	WT2_FPKM	RSTA1_FPKM	RSTA2_FPKM	fold	Product
Z2546m	25.46	557.33	15.01	13.29	0.0485595	anthranilate synthase component I
Z1741	762.45	806.21	55.36	51.64	0.0682111	ferric-rhodotorulic acid/ferric-coprogen receptor FhuE
Z4522	174.61	703.34	29.59	32.56	0.0707899	tryptophan permease
Z2548	30.32	619.08	27.46	26.71	0.0834155	bifunctional anthranilate synthase glutamate amidotransferase component TrpG/anthranilate phosphoribosyltransferase TrpD
Z2712	404.18	510.48	46.34	45.25	0.100136	Fe-S cluster assembly scaffold SufA
Z2711	301.82	376.19	37.5	40.09	0.114438	Fe-S cluster assembly protein SufB
Z5351	136.21	117.88	20.75	19.08	0.156755	5-methyltetrahydropteroyltriglutamate--homocysteine S-methyltransferase
Z4910	7067.18	6926.93	1166.3	1211.68	0.169927	heme oxygenase ChuS
Z4843	327.11	501.14	71.39	70.15	0.17089	Zn(II)/Cd(II)/Pb(II) translocating P-type ATPase ZntA
Z2709	323.01	412.3	65.38	63.32	0.175028	Fe-S cluster assembly protein SufD
Z2707	468.03	573.86	98.78	89.9	0.181094	cysteine desulfuration protein SufE
Z2708	361.54	456.87	76	75	0.184504	cysteine desulfurase
Z2710	118.55	146.08	24.55	24.32	0.184673	Fe-S cluster assembly ATPase SufC
Z3658	675.98	809.86	142.26	134.17	0.186043	Mn(2+) uptake NRAMP transporter MntH
Z2214	53.74	37.69	8.89	8.26	0.187575	insulinase family protein
Z4911	2385.83	2622.22	483.87	472.22	0.190911	TonB-dependent hemoglobin/transferrin/lactoferrin family receptor
Z4912	735.2	744	160.69	125.81	0.193686	hypothetical protein
Z2735	184.88	220.07	39.37	42.46	0.202074	YdiU family protein
Z1751	183.21	127.08	45.18	19.94	0.209868	multiple stress resistance protein BhsA
Z2283	9.28	17.81	2.02	4.09	0.225544	DUF2554 family protein
Z0996	20.29	20.32	5.14	4.72	0.242797	malonyl-ACP O-methyltransferase BioC
Z1023	347.52	284.61	82.18	75.64	0.249664	DUF1471 domain-containing protein
Z3970	161.7	167.76	35.58	47.37	0.251776	L-alanine exporter AlaE
Z5855	133.57	155.81	36	37.28	0.253231	aspartate carbamoyltransferase regulatory subunit
Z2608	273.98	315.05	74.94	74.38	0.253502	GlpM family protein
Z5628	549.8	477.45	135.77	135.67	0.264239	phosphate-starvation-inducible protein PsiE
Z0994	28.61	24.87	7.02	7.16	0.265146	biotin synthase BioB
Z0997	24.79	20.34	6.19	5.89	0.267671	ATP-dependent dethiobiotin synthetase BioD
Z0995	30.38	28.49	6.46	9.36	0.268728	8-amino-7-oxononanoate synthase
Z1748	1267.41	1594.44	405.33	378.85	0.274012	NAD(P)/FAD-dependent oxidoreductase
Z2549	86.17	624.67	97.91	97.52	0.274928	bifunctional indole-3-glycerol-phosphate synthase TrpC/phosphoribosylanthranilate isomerase TrpF
Z3975	81.63	95.9	26.54	23.05	0.279333	glutaredoxin-like protein NrdH
Z1024	29.15	20.84	9.31	5.11	0.288458	C4-type zinc finger protein YbiI
Z4908	3690.84	3377.43	1104.23	942.71	0.289596	outer membrane lipoprotein Slp
Z5856	251.66	296.12	81.87	77.53	0.290993	aspartate carbamoyltransferase
Z0167	166.77	185.15	57.67	46.57	0.296204	iron-sulfur cluster insertion protein ErpA
Z0738	486.29	496.07	161.47	142.13	0.309052	2%2C3-dihydro-2%2C3-dihydroxybenzoate dehydrogenase
Z1464	54.29	70.57	19.59	19.36	0.311949	Shiga toxin Stx2 subunit A
Z0737	858.99	863.93	277.54	263.15	0.313822	enterobactin biosynthesis bifunctional isochorismatase/aryl carrier protein EntB
Z2213	39.51	33.55	13.49	9.82	0.319053	TonB-dependent receptor
Z3690	16.31	24.62	6.72	6.51	0.323235	sulfate ABC transporter substrate-binding protein
Z1698	14.68	10.82	4.42	3.84	0.323922	DNA damage-inducible protein I
Z2971	10.29	15.51	3.99	4.49	0.328682	DUF4761 family protein
Z0398	108.61	147.12	44.27	40.48	0.331404	choline dehydrogenase
Z3085	3.29	12.92	3.02	2.38	0.333128	phage tail assembly protein T
Z1931	1826.2	1756.75	706.63	501.95	0.337314	omptin family outer membrane protease OmpT
Z1341	795.82	863.43	306.25	254.8	0.338135	alpha/beta hydrolase
Z1478	129.15	163.35	49.34	51.36	0.344274	hypothetical protein
Z6074	27.71	27.06	8.86	10.13	0.346723	hypothetical protein
Z4894	85.62	88.21	35.62	26.57	0.357763	universal stress protein UspB
Z2219	23.17	23.36	7.98	8.73	0.359123	diguanylate cyclase DosC
Z1025	119.55	86.64	39.14	36.69	0.367768	PKHD-type hydroxylase YbiX
Z2062	35.16	32.99	10.09	15	0.368158	tRNA-Arg
Z0923	17.77	20	7.34	6.89	0.376754	hypothetical protein
Z2545	25.07	26.88	17.27	2.33	0.377286	trp operon leader peptide
Z0739	210.1	215.66	94.24	68.99	0.383385	proofreading thioesterase EntH
Z0993	44.34	44.92	20.48	13.92	0.385391	adenosylmethionine--8-amino-7-oxononanoate transaminase
Z0608	10.65	11.96	4.01	4.88	0.393189	transporter
Z0400	172.1	209.45	81.95	69.12	0.395938	transcriptional regulator BetI
Z0539	59.95	58.59	21.51	25.76	0.398768	transcriptional regulator BolA
Z0137	1171.02	1193.93	509.68	437.63	0.400562	carbonate dehydratase
Z4661	4175.5	3927.3	1699.59	1583.89	0.405228	large-conductance mechanosensitive channel protein MscL
Z1480	12.15	16.44	6.78	4.85	0.406786	hypothetical protein
Z4326	263.99	266.3	124.16	91.78	0.407211	ShET2/EspL2 family type III secretion system effector toxin
Z4385	126.6	128.75	55.27	49.52	0.410378	ABC transporter ATP-binding protein
Z1692	286.15	215.08	120.36	86.23	0.412166	YceI family protein
Z5661	193.94	150.11	75.32	66.77	0.412992	superoxide response transcriptional regulator SoxS
Z0574	197.95	165.18	71.71	78.41	0.413406	Hha toxicity modulator TomB
Z4815	41.44	47.73	19.74	17.15	0.413704	DUF2756 family protein
Z0726	151.96	198.87	83.04	62.34	0.414389	MbtH family protein
Z1000	263.23	243.67	106.92	103.85	0.415802	GTP 3'%2C8-cyclase MoaA
Z0399	58.82	76.46	30.5	25.95	0.417283	betaine-aldehyde dehydrogenase
Z3974	14.36	11.76	6.12	4.86	0.420368	carboxymuconolactone decarboxylase family protein
Z4841	93.07	70.57	34.97	33.84	0.420496	DUF2500 domain-containing protein
Z4928	894.31	879.56	380.38	366.03	0.420781	acid resistance transcriptional activator GadW
Z0925	5141.52	5739.91	2164.75	2427.3	0.422008	2%2C3-diphosphoglycerate-dependent phosphoglycerate mutase
Z1479	41.41	57.85	18.04	23.85	0.422023	N4-gp56 family major capsid protein
Z2090	2837.98	2679.78	1290.86	1046.53	0.423612	LexA family transcriptional regulator
Z1930	360.47	359.19	160.88	144.05	0.423714	alpha/beta hydrolase
Z0734	804.55	754.45	372.92	293.42	0.427415	Fe2+-enterobactin ABC transporter substrate-binding protein
Z2212	35.8	36.02	16.69	14.14	0.429268	ABC transporter ATP-binding protein/permease
Z5884	59.3	58.42	24.25	26.48	0.430938	DUF1643 domain-containing protein
Z4909	279.17	324.44	131.43	130.13	0.433326	helix-turn-helix transcriptional regulator
Z4041	13.38	10.59	6.59	3.86	0.435962	nitrous oxide-stimulated promoter family protein
Z5142	689.04	659.38	329.31	261.44	0.438105	type III secretion system LEE effector EspG
Z5175	15.4	15.97	8	5.76	0.438636	AraC family transcriptional regulator
Z0510	55.21	59.2	26.46	23.83	0.439559	type II toxin-antitoxin system RelE/ParE family toxin
Z4237	683.72	727.9	305.22	315.68	0.439849	hemolysin III family protein
Z2706	114.72	148.79	58.77	57.57	0.441501	L%2CD-transpeptidase LdtE
Z3397	57.54	53.54	22.56	26.56	0.442204	CidB/LrgB family autolysis modulator
Z5348	43.87	43.96	20.55	18.44	0.443926	biotin transporter
Z1448	56.9	63.14	27.95	25.79	0.447684	transcriptional regulator
Z5995	175.26	250.1	97.44	93.45	0.448773	trp operon repressor
Z3361	31.82	19.06	14.23	8.85	0.453616	hypothetical protein
Z1441	38.56	43.41	25.08	12.26	0.455533	hypothetical protein
Z4890	12.32	13.56	5.31	6.48	0.455564	DUF2776 domain-containing protein
Z4386	115.66	127.76	54.71	56.38	0.456372	TonB-dependent siderophore receptor
Z0003	124.06	144.19	54.64	67.87	0.456701	homoserine kinase
Z3978	127.74	124.01	55.86	59.18	0.456961	class 1b ribonucleoside-diphosphate reductase subunit beta
Z4769	283.02	365.88	161.64	135.64	0.458129	iron-sulfur cluster biogenesis protein NfuA
Z2036	17.95	17.44	8.38	7.89	0.459734	integrase
Z1306	64.5	57.95	28.48	27.82	0.45978	macrodomain Ter protein MatP
Z2758	22.85	19.38	9.71	9.73	0.460336	L-cystine transporter
Z0209	755.55	632.33	338.11	304.1	0.462727	methionine ABC transporter membrane-anchored lipoprotein MetQ
Z2948	126.49	134.8	62.32	58.75	0.463355	universal stress protein UspC
Z3976	183.63	240.19	95.68	100.93	0.4639	class Ib ribonucleoside-diphosphate reductase assembly flavoprotein NrdI
Z4923	2350.4	2786.77	1200.63	1191.98	0.465745	HdeD family acid-resistance protein
Z3062	11.72	7.89	4.13	5.07	0.469148	hydroxyisourate hydrolase
Z3642	128.6	124.47	58.85	60.07	0.46991	DUF2545 family protein
Z0718	55.03	52.79	23.17	27.61	0.47097	MmcQ/YjbR family DNA-binding protein
Z0237	226.88	207.66	98.46	106.61	0.471924	SAM-dependent methyltransferase
Z4566	590.71	651.53	318.43	272.01	0.475303	ribosome hibernation promoting factor
Z4238	74.12	71.35	32.38	37.02	0.477074	ASCH domain-containing protein
Z1481	5.86	10.21	2.69	5	0.478531	hypothetical protein
Z4577	137.3	149.37	66.38	71.04	0.479367	glutamate synthase subunit beta
Z1005	329.32	298.93	154.55	148.95	0.483088	Bax inhibitor-1/YccA family protein
Z3981	235.85	201.63	112.39	99.3	0.483885	proline/glycine betaine ABC transporter substrate-binding protein ProX
Z3199	591.09	631.19	311.26	282.11	0.485462	glycosyltransferase
Z2228	115.69	150.39	65.84	63.45	0.485906	peroxiredoxin OsmC
Z0487	2880.53	2464.18	1406.56	1191.62	0.486122	pyrimidine/purine nucleoside phosphorylase
Z5110	2010.03	2483.14	1114.43	1070.31	0.486236	intimin type gamma
Z0004	211.25	234.35	110.27	108.85	0.491741	threonine synthase
Z4683	186.26	161.31	85.81	85.87	0.493944	50S ribosomal protein L29
Z2273	246.36	245.58	145.47	99.18	0.497317	DUF2526 domain-containing protein
Z1456	169.65	174.21	95.93	75.11	0.497412	hypothetical protein
Z5106	1232.74	1762.12	786.71	705.13	0.498133	type III secretion system LEE translocon pore-forming subunit EspD
Z1925	113.89	111.91	56.77	55.77	0.498406	class I SAM-dependent methyltransferase
Z4708	71.28	89.08	34.03	45.98	0.49894	YheV family putative metal-binding protein
Z1516	13.35	16.02	8.67	6.02	0.50017	hypothetical protein
Z0056	38.09	33.09	18.6	17.05	0.500843	antitoxin
Z5122	3211.45	3624.58	1813.94	1610.2	0.500896	type III secretion system LEE cytoprotective effector EspZ
Z0509	32.03	33.36	18.55	14.26	0.501759	type II toxin-antitoxin system ParD family antitoxin
Z2828	26.54	37.95	15.24	17.16	0.502403	hypothetical protein
Z4048	23.23	14.53	11.05	8.24	0.510858	MarR family transcriptional regulator
Z6024	136.89	212.4	91.78	86.72	0.511037	type III secretion system effector NleA
Z0230	111.33	113.44	57.76	57.15	0.511234	LysR family transcriptional regulator
Z1026	143.01	89.13	60.87	57.96	0.511889	catecholate siderophore receptor Fiu
Z0401	14.75	17.67	7.95	8.67	0.512647	choline BCCT transporter BetT
Z3198	2927.33	2852.29	1501.44	1466.53	0.513523	GDP-mannose 4%2C6-dehydratase
Z5902	163.38	166.91	86.06	84.11	0.515214	ATP-dependent helicase
Z4060	17.87	21.16	11.11	9.01	0.515501	sulfate adenylyltransferase subunit 2
Z1004	189.02	163.71	100.54	81.37	0.51572	molybdopterin synthase catalytic subunit MoaE
Z5287	30.59	39.25	18.31	17.74	0.51618	hypothetical protein
Z1099	164.7	189.31	95.95	87.19	0.51733	heavy metal-binding domain-containing protein
Z0276	56.48	59.78	30.44	29.83	0.518407	2-oxoglutaramate amidase
Z2657	292.54	328.73	168.66	153.54	0.518615	transcriptional regulator SlyA
Z2737	159.88	131.91	74.88	76.78	0.519757	lipoprotein
Z3947	75.74	64.04	40.68	32.17	0.521176	hypothetical protein
Z2210	161.08	195.31	99.56	87.54	0.524987	sulfatase
Z0080	108.53	128.37	71.05	53.37	0.525201	3-isopropylmalate dehydratase small subunit
Z0727	1473.15	1608.34	812.34	809.27	0.526242	enterobactin non-ribosomal peptide synthetase EntF
Z4842	297.78	300.62	171.8	145.54	0.530314	lysoplasmalogenase
Z1100	163.04	216.48	99.14	102.36	0.530934	N-acetylmuramoyl-L-alanine amidase
Z1315	10.89	15.15	3.28	10.61	0.53341	DUF2057 family protein
Z5659	52.41	47.19	25.35	27.93	0.53494	membrane protein
Z5729	53.31	58.94	27.9	32.31	0.536392	N-acetyltransferase
Z5452	18.64	17.3	9.16	10.15	0.537284	L-rhamnose/proton symporter RhaT
Z4460	10.93	15.34	8.64	5.53	0.539399	pirin family protein
Z5105	1735.23	2487.9	1223.13	1057.63	0.540064	type III secretion system LEE translocon pore-forming subunit EspB
Z0475	8.4	10.96	5.03	5.44	0.540806	DUF2755 family protein
Z5570	305.8	260.22	144.36	162.91	0.542861	Rsd/AlgQ family anti-sigma factor
Z5833	126.01	122.04	61.36	73.39	0.543237	gamma-glutamylcyclotransferase
Z4126	43.54	34.49	24.54	17.96	0.544662	YgdI/YgdR family lipoprotein
Z4824	37.13	35.41	20.25	19.27	0.544803	high-affinity branched-chain amino acid ABC transporter ATP-binding protein LivF
Z2839	60.79	82.67	43.18	35	0.54496	DUF1971 domain-containing protein
Z1442	35.25	33.71	21.05	16.68	0.547129	hypothetical protein
Z3373	11.61	11.95	5.12	7.78	0.547538	DUF4222 domain-containing protein
Z3680	1376.75	1328.42	771.1	710.46	0.547677	cysteine synthase A
Z3372	13.99	19	9.42	8.68	0.548651	DUF551 domain-containing protein
Z0181	1252.35	982.19	627.77	603.09	0.550834	elongation factor Ts
Z1001	236.62	200.93	127.56	114.22	0.552577	molybdenum cofactor biosynthesis protein B
Z0266	47.82	45.46	25.46	26.1	0.552744	Hcp family type VI secretion system effector
Z3231	555.54	557.51	313.01	303.13	0.55356	XRE family transcriptional regulator
Z3067	33.14	32.81	18.73	17.8	0.553904	cytochrome b
Z5107	2217.32	2950.96	1425.5	1439.17	0.554279	type III secretion system LEE translocon filament protein EspA
Z1465	148.75	152.35	84.63	82.45	0.554899	Shiga toxin Stx2 subunit B
Z5867	116.33	88.2	67.09	46.59	0.555811	ribonuclease E inhibitor RraB
Z4072	17.8	11.03	9.09	7	0.558099	phosphoadenosine phosphosulfate reductase
Z5728	13.67	12.05	10.77	3.64	0.560264	4Fe-4S mono-cluster protein YjdI
Z2329	302.89	312.72	160.3	184.78	0.56055	D-lactate dehydrogenase
Z2889	234.35	244.22	143.83	124.9	0.561527	CopC domain-containing protein YobA
Z4922	29388	29068.8	17892	14953.5	0.561877	acid-activated periplasmic chaperone HdeA
Z3230	198.34	168.8	103.17	103.15	0.561965	type II toxin-antitoxin system RelE/ParE family toxin
Z4684	1440.24	1173.01	717.81	754	0.563211	50S ribosomal protein L16
Z3920	204.22	241.05	137.97	113.34	0.564399	hypothetical protein
Z3411	872.37	662.7	438.36	429.23	0.565179	catecholate siderophore receptor CirA
Z5389	73.86	81.07	49.16	38.42	0.565288	molybdenum cofactor guanylyltransferase MobA
Z3071	950.12	932.88	543.55	521.85	0.565799	type III secretion system effector ADP-ribosyltransferase EspJ
Z2045	595.32	518.02	381.73	249.92	0.567347	helix-turn-helix domain-containing protein
Z1002	137.65	129.2	74.52	77.14	0.568334	cyclic pyranopterin monophosphate synthase MoaC
Z3687	59.8	47.16	33.55	27.26	0.56853	sulfate/thiosulfate ABC transporter ATP-binding protein CysA
Z5388	75.21	76.76	45.04	41.57	0.569915	molybdopterin-guanine dinucleotide biosynthesis protein B
Z5275m	204.01	227.85	123.42	122.77	0.570069	HTH-type transcriptional regulator HdfR
Z4059	27.41	28.55	16.98	15	0.57148	sulfate adenylyltransferase subunit CysN
Z0156	396.83	298.47	215.77	182.85	0.573306	RNA polymerase-binding transcription factor DksA
Z0696	11.1	10.64	8.77	3.72	0.574517	helix-turn-helix domain-containing protein
Z0002	168.79	173.88	102.3	94.91	0.57551	bifunctional aspartate kinase/homoserine dehydrogenase I
Z1444	880.86	782.62	521.68	436.4	0.575949	serine/threonine protein kinase
Z4722	23.01	24.28	14.18	13.06	0.57602	putative adenosine monophosphate-protein transferase Fic
Z0528	300.71	324.21	193.1	167.31	0.57673	2-dehydropantoate 2-reductase
Z4685	1688.2	1316.83	852.91	880.94	0.576983	30S ribosomal protein S3
Z5576	8340.41	7084.67	4922.72	3992.81	0.577989	DNA-binding protein HU-alpha
Z5140	233.15	201.32	161.41	89.93	0.578498	type III secretion system LEE master regulator Ler
Z1432	7.43	10.94	6.02	4.61	0.578661	ead/Ea22-like family protein
Z3043	6.43	10.08	8.18	1.38	0.579043	peroxide/acid resistance protein YodD
Z3552	223.37	233.29	138.6	125.84	0.579074	5'-deoxynucleotidase
Z4597	19.66	14.66	15.9	3.98	0.579254	peroxide/acid stress response protein YhcN
Z4457	74.9	76.69	50.54	37.3	0.579458	DUF805 domain-containing protein
Z4328	161.47	169.62	95.62	96.42	0.580024	type III secretion system effector arginine glycosyltransferase NleB
Z2013	6231.22	5084.4	3489.43	3079.63	0.58053	DNA-binding transcriptional regulator H-NS
Z0725	1015.42	995.3	613.09	554.75	0.580807	enterochelin esterase
Z5748	1296.65	1072.66	700.55	680.77	0.583005	chaperonin GroEL
Z0772	37.6	29.06	18.29	20.59	0.583258	twin-arginine translocase subunit TatE
Z0130	3040.17	2246.13	1603.24	1492.9	0.585691	adenosylmethionine decarboxylase
Z5062	2259.83	2361.38	1337.36	1382.12	0.588478	JAB domain-containing protein
Z3972	15.73	14.66	5.18	12.73	0.589339	DUF883 domain-containing protein
Z0606	83.19	81.17	47.15	50.09	0.591628	glutaminase A
Z0301	383.62	342.48	242.43	187.3	0.591833	sigma factor-binding protein Crl
Z0005	26.21	24.03	20.93	8.84	0.592556	DUF2502 domain-containing protein
Z3168	9873.31	8979.32	6042.23	5130.69	0.592645	DUF496 family protein
Z4465	12.15	16.13	4.38	12.39	0.592999	enamine/imine deaminase
Z0131	1397.75	1027.29	735.41	703	0.593149	polyamine aminopropyltransferase
Z5888	82.73	79.35	46.46	49.68	0.593164	XRE family transcriptional regulator
Z3686	24.86	21.09	12.1	15.2	0.594124	cysteine synthase B
Z2267	3830.8	3503.54	2149.18	2219.02	0.595582	YncE family protein
Z2054	17887.7	16301.7	10212.1	10189.2	0.596715	type I toxin-antitoxin system Hok family toxin
Z2858	6.21	10.14	4.57	5.19	0.596942	cyclic diguanylate phosphodiesterase
Z4528	160.8	114.96	83.13	81.5	0.597005	30S ribosome-binding factor RbfA
Z3470	12.65	13.75	8.83	6.94	0.597348	DNA oxidative demethylase AlkB
Z5026	50.35	54.66	33.83	28.93	0.597657	YibL family ribosome-associated protein
Z4073	32.67	21.89	17.42	15.2	0.597874	assimilatory sulfite reductase (NADPH) hemoprotein subunit
Z0511	224.66	213.11	137.12	124.63	0.597917	HNH nuclease family protein
Z5143	43.67	54.8	32.26	26.67	0.598456	hypothetical protein
Z3200	1095.46	1109.92	736.24	584.39	0.598822	DegT/DnrJ/EryC1/StrS aminotransferase family protein
Z2288	60.78	60.9	39.77	33.24	0.600016	tellurite resistance methyltransferase TehB
Z4934	46.5	44.76	31.78	22.99	0.600153	LysR family transcriptional regulator
Z2792	36.37	32.79	25.05	16.54	0.601359	DUF1496 domain-containing protein
Z3770	11.07	12.32	8.64	5.45	0.602394	hypothetical protein
Z2573	51.61	40.72	27.94	27.8	0.603704	DUF1161 domain-containing protein
Z1728	884.36	830.87	526.16	510.58	0.604432	50S ribosomal protein L32
Z4913	1200.63	1147.43	714.57	705.27	0.604686	hemin ABC transporter substrate-binding protein
Z0529	1812.6	1787.41	1014.13	1163.47	0.604887	YajQ family cyclic di-GMP-binding protein
Z3911	15.12	14.14	10.15	7.58	0.605947	RnfH family protein
Z0125	1305.56	1540.03	848.04	876.28	0.605962	pyruvate dehydrogenase complex dihydrolipoyllysine-residue acetyltransferase
Z3939	89.2	81.61	59.86	43.79	0.606815	hypothetical protein
Z1697	1979.78	1612.12	1178.27	1003.6	0.607442	biofilm formation regulator BssS
Z3273	43.39	35.9	27.9	20.39	0.60903	Ni(II)/Co(II)-binding transcriptional repressor RcnR
Z3895	13.25	12.89	9.34	6.6	0.609793	DUF2799 domain-containing protein
Z2452	2160.38	2151.16	1384.52	1252.49	0.611617	thiol peroxidase
Z0922	70.75	66.44	47.16	36.91	0.6128	zinc transporter ZitB
Z0201	534.43	606.8	377.92	323.69	0.614784	Rho-binding antiterminator
Z0008	1410.3	1455.44	909.16	855.08	0.615632	transaldolase
Z4313	532.44	580.44	363.42	322.59	0.616428	DUF4102 domain-containing protein
Z5649	171.17	189.34	118.31	104.8	0.618873	quinone oxidoreductase
Z4662	18.01	18.74	12.41	10.35	0.61932	Zn(2+)-responsive transcriptional regulator
Z0078	67.69	54.12	42.81	32.79	0.620639	hypothetical protein
Z3196	290	311.23	195.06	178.11	0.620678	GDP-mannose mannosyl hydrolase
Z4655	39.03	41.35	28.86	21.05	0.620926	DUF494 domain-containing protein
Z3396	38.17	18.8	18.31	17.11	0.621731	hypothetical protein
Z1679	166.26	177.39	116.43	97.34	0.622057	O-acetyl-ADP-ribose deacetylase
Z5225	11.79	8.63	5.93	6.79	0.622919	fimbrial protein
Z4706	53.06	58	41.88	27.33	0.623177	protein SlyX
Z0232	373.65	415.5	249.16	242.8	0.623405	endonuclease/exonuclease/phosphatase family protein
Z0736	754.83	649.59	446.14	429.77	0.623681	(2%2C3-dihydroxybenzoyl)adenylate synthase
Z4380	1589.43	1456.76	1073.25	828.1	0.624173	antibiotic biosynthesis monooxygenase
Z3977	287.01	326.73	199.78	183.44	0.624401	class 1b ribonucleoside-diphosphate reductase subunit alpha
Z4712	21.34	20.71	12.88	13.43	0.625684	glutathione-regulated potassium-efflux system ancillary protein KefG
Z5778	471.19	453.52	281.45	297.15	0.62571	tRNA (adenosine(37)-N6)-dimethylallyltransferase MiaA
Z0861	69.3	73.34	52.86	36.7	0.627874	Nif3-like dinuclear metal center hexameric protein
Z2682	23.58	25.03	17.49	13.06	0.628472	LysR family transcriptional regulator
Z3086	33.34	39.18	23.52	22.09	0.62893	phage minor tail protein G
Z5285	7165.39	7056.46	4542.82	4407.57	0.629341	ketol-acid reductoisomerase
Z5111	1172.22	1341.06	808.86	774.11	0.629842	type III secretion system LEE chaperone CesT
Z0177	133.58	169.82	100.77	90.4	0.630092	bifunctional uridylyltransferase/uridylyl-removing protein GlnD
Z1015	143.53	156.71	99.11	90.3	0.630862	secretion protein HlyD
Z0418	13.35	10.7	7.52	7.67	0.631601	ABC transporter permease
Z2834	325.15	318.79	221.99	184.98	0.632	DUF488 domain-containing protein
Z3867	219.45	167.64	128.79	116.01	0.632411	thioredoxin TrxC
Z0531	124.08	103.33	69.26	74.61	0.632646	protoheme IX farnesyltransferase
Z1052	117.84	119.78	78.49	72.09	0.633701	L-asparaginase
Z3509	39.99	33.51	25.91	20.71	0.634286	nucleoside triphosphatase NudI
Z0229	74.37	87.88	52.78	50.29	0.635254	2%2C5-didehydrogluconate reductase DkgB
Z0178	579.54	516.18	343.91	352.16	0.635263	type I methionyl aminopeptidase
Z5882	121.28	96.64	67.22	71.27	0.635508	NIPSNAP family protein
Z2887	181.43	185.36	112.26	120.98	0.635895	DUF2511 domain-containing protein
Z3041	33.08	22.68	16.44	19.02	0.63594	transcriptional regulator RcsA
Z2936	8.1	11.48	4.38	8.08	0.636364	two-component system response regulator
Z3688m	16.48	12.02	8.69	9.47	0.637193	sulfate/thiosulfate ABC transporter permease CysW
Z4421	198.7	210.22	133.36	127.59	0.638144	G/U mismatch-specific DNA glycosylase
Z3197	1228.58	1240.36	822.72	753.03	0.638229	GDP-L-fucose synthase
Z1314	1436.6	1407.49	896.72	919.49	0.638591	methylglyoxal synthase
Z2104	206.98	181.64	117.34	131.05	0.639159	helix-turn-helix domain-containing protein
Z3891	129.53	120.15	82.34	77.34	0.639539	bifunctional chorismate mutase/prephenate dehydratase
Z1027	17.27	12.84	12.28	7	0.640319	DUF1471 domain-containing protein
Z1077	309.85	261.7	204.55	162.99	0.643058	DUF1418 family protein
Z4681	283.14	240.54	165.8	171.32	0.643752	30S ribosomal protein S17
Z2769	85.53	85.65	64.19	46.16	0.644643	osmotically-inducible lipoprotein OsmE
Z4925	1634.74	1494.16	1043.9	975.95	0.645546	acid resistance transcriptional activator GadE
Z0873	987.21	1093.44	676.83	666.39	0.645577	citrate (Si)-synthase
Z0573	200.39	174.01	144.08	98.3	0.647382	hemolysin expression modulator Hha
Z4973	12.91	12.81	7.56	9.16	0.650078	autotransporter outer membrane beta-barrel domain-containing protein
Z5453	3899.27	3702.86	2698.73	2251.95	0.651223	superoxide dismutase [Mn]
Z2439	13.41	11.56	9.15	7.12	0.651582	LysR family transcriptional regulator
Z4657	1046.96	1002.48	650.7	685.06	0.651768	peptide deformylase
Z5050	182.2	139.82	111.78	98.21	0.652102	lipopolysaccharide N-acetylglucosaminyltransferase
Z3310	23.69	27.62	17.36	16.1	0.652115	outer membrane protein
Z4424	115.16	101.59	70.74	70.68	0.652457	PadR family transcriptional regulator
Z5823	10.66	13.02	8.57	6.89	0.652872	transcriptional regulator
Z3056	77.27	90.16	52.38	56.97	0.653109	permease
Z5968	2311.05	2291.88	1537.42	1472.98	0.654018	hydroxamate siderophore iron reductase FhuF
Z1822	29.43	26.56	20.04	16.58	0.654045	type III secretion system effector E3 ubiquitin ligase NleL
Z4895	7099.53	6111.32	4693.46	3949.46	0.654229	universal stress protein UspA
Z5276	232.95	199.85	152.23	131.34	0.655199	macrodomain Ori organization protein MaoP
Z4400	250.7	232.89	164.94	151.98	0.655349	ubiquinone biosynthesis accessory factor UbiK
Z4463	33.45	36.24	24.97	20.73	0.655761	HAAAP family serine/threonine permease
Z5469	276.07	281.8	190.39	175.44	0.655762	ferredoxin--NADP(+) reductase
Z4481	83.6	67.69	43.49	55.94	0.657215	type II toxin-antitoxin system PrlF family antitoxin
Z4384	19.38	15.86	10.9	12.27	0.657491	iron ABC transporter permease
Z5473	291.21	275.4	209.14	163.5	0.657666	septal ring assembly protein ZapB
Z5723	12.89	12.67	8.14	8.67	0.657668	DUF2238 domain-containing protein
Z1538	32.78	25.45	17.73	20.59	0.65808	type 1 fimbrial protein
Z2835	70.79	78.76	58.52	39.95	0.658442	DUF333 domain-containing lipoprotein YoaF
Z3059	224.17	288.25	156.71	180.82	0.658698	protein deglycase HchA
Z2824	12.12	12.06	7.63	8.34	0.660463	YeaH/YhbH family protein
Z6065	16.2	19.65	14.88	8.8	0.66053	DUF551 domain-containing protein
Z2736	494.39	469.35	333.95	302.69	0.660593	anti-FlhDC factor
Z1412	28.65	28.98	20.19	17.88	0.660593	two-component system response regulator TorR
Z1812	10.83	3.23	7.05	2.24	0.66074	tail assembly chaperon
Z0825	148.45	172.94	115.27	97.15	0.660942	glucosamine-6-phosphate deaminase
Z5825	129.71	132.25	86.21	87.16	0.661819	3'(2')%2C5'-bisphosphate nucleotidase CysQ
Z5632	51.62	47.95	36.54	29.36	0.661846	maltose/maltodextrin ABC transporter substrate-binding protein MalE
Z6063	15369.2	13721.9	10636.1	8635.24	0.662446	type I toxin-antitoxin system Hok family toxin
Z3768	151.59	119.72	107.67	72.2	0.662969	DUF2633 family protein
Z0920	57.97	48.9	36.48	34.42	0.663423	nicotinamide riboside transporter PnuC
Z5123	134.64	153.41	95.65	95.47	0.663496	type III secretion system LEE inner rod protein EscI
Z3195	817.96	848.2	568.43	537.24	0.663604	Mannose-1-phosphate guanylyltransferase 2
Z4887	38.99	38.54	25.38	26.14	0.664517	DUF4049 domain-containing protein
Z3866	12.72	17.2	13.71	6.18	0.664773	hypothetical protein
Z6073	26.97	23.92	23.94	9.9	0.664964	hypothetical protein
Z3988	748.82	731.51	488	497.18	0.665514	S-ribosylhomocysteine lyase
Z1078	226.1	215.69	151.14	142.92	0.66561	nitroreductase NfsA
Z1240	133.3	112.12	83.15	80.23	0.665716	dimethylsulfoxide reductase subunit A
Z3237	38	43.6	26.55	27.83	0.666422	DNA-3-methyladenine glycosylase 2
Z5621	138.85	146.68	111.6	79.63	0.669737	DUF3811 domain-containing protein
Z0377	101.85	107.72	72.54	67.87	0.669991	aldo/keto reductase

## Sheet: Excel file S2
Up-regulated gene
old_locus_tag	WT1_FPKM	WT2_FPKM	RSTA1_FPKM	RSTA2_FPKM	fold	Product
Z0007	36.9	26.21	66.37	64.73	2.07733	sodium:alanine symporter family protein
Z0027	399.55	336.82	800.14	616.16	1.92335	30S ribosomal protein S20
Z0037	172.61	113.19	321.97	304.71	2.19272	carbamoyl-phosphate synthase small subunit
Z0043	23.88	19.62	46.01	39.73	1.97103	crotonobetaine/carnitine-CoA ligase
Z0044	23.34	27.31	61.64	59.49	2.39151	L-carnitine CoA-transferase
Z0045	6.42	6.03	10.06	10.38	1.64177	crotonobetainyl-CoA dehydrogenase
Z0055	53.59	51.42	88.4	73.73	1.54395	type 3 dihydrofolate reductase
Z0058	49.03	51.73	80.56	78.79	1.58148	bis(5'-nucleosyl)-tetraphosphatase (symmetrical)
Z0063	329.82	321.28	541.35	540.09	1.66094	LPS assembly protein LptD
Z0065	23.67	21.37	34.89	33.05	1.50844	UDP pyrophosphate phosphatase
Z0067	50.8	31.75	80.79	77.13	1.91302	RNA polymerase-associated protein RapA
Z0075	11.3	8.13	18.9	14.72	1.73031	thiamine ABC transporter ATP-binding protein ThiQ
Z0076	8.12	6.68	16.79	16.23	2.23108	thiamine/thiamine pyrophosphate ABC transporter permease ThiP
Z0077	18.92	14.14	38.07	35.11	2.21355	thiamine ABC transporter substrate binding subunit
Z0090	162.32	149.15	370.57	355.48	2.33104	catabolite repressor/activator
Z0107	316.01	329.93	557.21	476.76	1.60072	secA regulator SecM
Z0108	170.81	165.96	285.48	296.41	1.72786	preprotein translocase subunit SecA
Z0109	58.53	48.21	101.68	91.85	1.8131	8-oxo-dGTP diphosphatase MutT
Z0111	169.22	180.25	290.46	273.67	1.61424	DNA gyrase inhibitor YacG
Z0112	81.88	81.63	132.25	122.09	1.5555	cell division protein ZapD
Z0136	134.24	111.07	193.93	187.54	1.55505	hypoxanthine phosphoribosyltransferase
Z0139	19.17	19.61	30.44	31.6	1.59979	ABC transporter permease
Z0140	38.12	38.41	65.21	72.15	1.79485	PTS sugar transporter subunit IIA
Z0153	32	31.81	104.27	84.36	2.95612	2-amino-4-hydroxy-6-hydroxymethyldihydropteridine diphosphokinase
Z0154	201.78	194.13	431.8	429.6	2.17575	polynucleotide adenylyltransferase PcnB
Z0155	19.72	17.1	35.72	36.82	1.97012	tRNA glutamyl-Q(34) synthetase GluQRS
Z0162	79.03	71.56	117.45	117.91	1.56292	Fe3+-hydroxamate ABC transporter ATP-binding protein FhuC
Z0163	142.95	143.38	238.13	224.64	1.61621	Fe(3+)-hydroxamate ABC transporter substrate-binding protein FhuD
Z0164	46.48	42.46	70.23	77.69	1.66314	Fe(3+)-hydroxamate ABC transporter permease FhuB
Z0173	101.57	75.64	167.11	153.14	1.80718	serine endoprotease DegP
Z0174	5.94	5.54	11.95	8.89	1.81533	CdaR family transcriptional regulator
Z0184	64.94	57.91	103.62	88.34	1.56256	1-deoxy-D-xylulose-5-phosphate reductoisomerase
Z0185	249.56	249.77	419.82	419.22	1.68033	(2E%2C6E)-farnesyl-diphosphate-specific ditrans%2Cpolycis-undecaprenyl-diphosphate synthase
Z0186	90.46	78.82	138.95	168.66	1.81717	phosphatidate cytidylyltransferase
Z0187	255.9	217.91	393.36	397.93	1.67006	sigma E protease regulator RseP
Z0188	427.42	398.59	600.02	641.04	1.50248	outer membrane protein assembly factor BamA
Z0194	70.59	66.86	115.93	126.22	1.76173	lipid-A-disaccharide synthase
Z0195	44.41	40.33	94.25	74.93	1.99646	ribonuclease HII
Z0196	71.97	64.81	114.2	107.15	1.61829	DNA polymerase III subunit alpha
Z0205	5.2	5.13	9.42	10.06	1.88577	YaeF family permuted papain-like enzyme
Z0206	98.24	92.83	174.52	179.6	1.85335	proline--tRNA ligase
Z0207	40.63	52.29	85.62	81.28	1.79617	tRNA (N6-threonylcarbamoyladenosine(37)-N6)-methyltransferase TrmO
Z0211	37.39	34.47	69.89	66.14	1.89299	methionine ABC transporter ATP-binding protein MetN
Z0219	3.08	2.15	26.1	2.87	5.5392	23S ribosomal RNA
Z0235	127.51	127.21	334.21	323.77	2.58315	murein transglycosylase D
Z0260	7.5	8.37	14.44	12.65	1.70699	type VI secretion system baseplate subunit TssF
Z0282	126.06	116.25	191.73	196.7	1.60303	murein L%2CD-transpeptidase
Z0299	201.79	164.73	458.86	422.34	2.40423	xanthine phosphoribosyltransferase
Z0303	118.54	103.12	209.78	250.45	2.07629	glutamate 5-kinase
Z0304	88.25	71.1	163.62	147.39	1.95174	glutamate-5-semialdehyde dehydrogenase
Z0358	10.45	8.19	22.15	21.87	2.36159	fimbrial biogenesis outer membrane usher protein
Z0359	63.41	48.83	135.45	130.44	2.36894	fimbrial chaperone EcpB
Z0360	89.02	58.43	141.69	124.3	1.80393	common pilus major fimbrillin subunit EcpA
Z0384	3.6	2.18	6.04	10.65	2.88754	(Fe-S)-binding protein
Z0432	25.25	12.67	33.18	38.25	1.8837	cytosine permease
Z0462	6.8	8.47	23.69	18.05	2.73346	sensor histidine kinase
Z0478	14.26	7.42	34.54	18.11	2.42851	anti-adapter protein IraP
Z0479	38.88	34.69	98.36	90.85	2.57184	alkaline phosphatase
Z0492	55.66	65.66	124.59	97.18	1.82798	recombination-associated protein RdgC
Z0496	39.48	30.77	64.09	49.5	1.61694	exonuclease subunit SbcD
Z0499	68.12	76.16	129.88	140.49	1.87393	branched-chain amino acid transporter carrier protein BrnQ
Z0500	39.66	38.74	88.24	80.63	2.15395	proline-specific permease ProY
Z0504	52.56	52.41	115.67	111.58	2.1649	tRNA preQ1(34) S-adenosylmethionine ribosyltransferase-isomerase QueA
Z0507	225.75	228.28	364.96	376.24	1.63249	protein translocase subunit SecD
Z0512	195.93	186.32	381.3	392.05	2.02315	nucleoside-specific channel-forming protein Tsx
Z0519	60.33	51.34	92.66	97.5	1.70287	thiamine-phosphate kinase
Z0520	24.05	17.35	34.64	30.73	1.57899	phosphatidylglycerophosphatase A
Z0523	64.79	70.52	136.16	132.3	1.98404	1-deoxy-D-xylulose-5-phosphate synthase
Z0524	99.28	114.12	190.84	195.56	1.81068	(2E%2C6E)-farnesyl diphosphate synthase
Z0525	176.88	197.65	324.94	241.57	1.51259	exodeoxyribonuclease VII small subunit
Z0526	56.37	54.27	111.99	111.1	2.01636	tRNA 4-thiouridine(8) synthase ThiI
Z0535	294.65	199.21	467.46	504.91	1.96892	cytochrome o ubiquinol oxidase subunit II
Z0536	33.78	33.03	70.24	72.85	2.14175	muropeptide MFS transporter AmpG
Z0552	9.15	7.25	12.61	12.47	1.52927	SgrR family transcriptional regulator
Z0581	44.15	42.56	67.34	70.01	1.58402	mechanosensitive channel MscK
Z0586	125.49	116.38	209.5	236.28	1.84306	adenine phosphoribosyltransferase
Z0591	330.05	266.53	564.39	499.83	1.78387	adenylate kinase
Z0596	61.98	58.68	145.55	133.9	2.31601	inosine/guanosine kinase
Z0639	7.32	4.28	10.55	7.74	1.57672	adhesin
Z0646	184.26	185.5	304.73	275.11	1.56815	NADP(+)-dependent aldehyde reductase
Z0657	28.02	28.84	56.35	43.92	1.76345	tRNA 2-selenouridine(34) synthase MnmH
Z0677	33.06	21.98	77.72	73.25	2.74291	5-(carboxyamino)imidazole ribonucleotide synthase
Z0678	28.31	19.21	85.64	83.6	3.56145	5-(carboxyamino)imidazole ribonucleotide mutase
Z0681	146.84	130.49	278.35	265.56	1.96124	cysteine--tRNA ligase
Z0683	34.43	39.76	66.41	52.75	1.60615	ribosome-associated protein YbcJ
Z0698	12.75	10.38	21.91	18.01	1.7259	phage receptor
Z0699	5.54	5.89	14.65	15.2	2.61155	phage adsorption protein NrfB
Z0708	9.03	7.26	13.19	14.64	1.70841	Cu(+)/Ag(+) sensor histidine kinase CusS
Z0715	23.43	20.38	49.33	47.21	2.20361	phenylalanine transporter
Z0733	96.31	104.44	216.07	213.3	2.13883	enterobactin transporter EntS
Z0764	8.57	7.66	12.93	13.8	1.64695	sensor histidine kinase DpiB
Z0765	15.57	10.48	22.37	21.74	1.69328	two-component response regulator DpiA
Z0766	81.15	51.85	204.44	204.34	3.07353	anaerobic C4-dicarboxylate transporter DcuC
Z0769	297.08	241.38	512.2	342.04	1.58645	transcription antiterminator/RNA stability regulator CspE
Z0774	6.15	6.97	10.1	13.21	1.77668	DNA-binding transcriptional regulator
Z0780	40.44	33.8	65.22	65.2	1.75673	peptidoglycan glycosyltransferase MrdB
Z0781	40.93	41.47	99.7	101.2	2.43811	peptidoglycan DD-transpeptidase MrdA
Z0782	88.95	94.35	178.69	181.98	1.96765	23S rRNA (pseudouridine(1915)-N(3))-methyltransferase RlmH
Z0783	64.57	70.38	108.51	115.91	1.66299	ribosome silencing factor
Z0785	38.34	46.65	83.81	82.36	1.95517	adenosylcobalamin/alpha-ribazole phosphatase
Z0801	47.25	41.62	82.04	76.96	1.78913	pyrimidine-specific ribonucleoside hydrolase RihA
Z0803	23.57	12.55	39.84	25.83	1.81811	glutamate ABC transporter permease
Z0804	56.64	36.9	83.28	81.91	1.76598	glutamate/aspartate ABC transporter permease GltJ
Z0806	111.86	102.04	200.99	187.03	1.81403	apolipoprotein N-acyltransferase
Z0810	59.3	51.36	108.64	113.49	2.00732	tRNA (N6-isopentenyl adenosine(37)-C2)-methylthiotransferase MiaB
Z0821	354.03	446.57	1028.12	1000.18	2.53347	asparagine synthase B
Z0827	331.26	320	505.14	496.43	1.5379	glutamine--tRNA ligase
Z0834	51.8	59.67	146.98	92.15	2.14524	LexA regulated protein
Z0860	9.36	8.98	15.31	15.31	1.66957	dipeptide permease DtpD
Z0867	96.11	69.91	172.66	170.21	2.06523	AbrB family transcriptional regulator
Z0875	73.18	65.76	300.51	279.5	4.17454	succinate dehydrogenase cytochrome b556 subunit
Z0876	8.1	4.87	30.82	25.35	4.33076	succinate dehydrogenase membrane anchor subunit
Z0877	80.32	59.22	221.85	232.31	3.25469	succinate dehydrogenase flavoprotein subunit
Z0878	83.39	83.86	146.98	132.26	1.6696	succinate dehydrogenase iron-sulfur subunit
Z0900	502.16	539.52	949.46	1049.4	1.91888	cytochrome bd-I ubiquinol oxidase subunit CydA
Z0901	668.87	691.71	1274.99	1348.77	1.92841	cytochrome d ubiquinol oxidase subunit II
Z0903	38.37	35.39	81.42	77.87	2.15957	cyd operon protein YbgE
Z0905	46.23	44.69	99.81	79.25	1.96942	Tol-Pal system protein TolQ
Z0906	62.85	59.22	110.87	105.99	1.77652	colicin uptake protein TolR
Z0913	123.21	119.39	239.29	214.17	1.86917	tRNA-Lys
Z0915	11.88	7.96	28.63	19.34	2.41784	tRNA-Lys
Z0933	38.77	34.7	1897.57	1889.56	51.5466	molybdate ABC transporter substrate-binding protein
Z0934	27.96	30.33	737.31	749.55	25.508	molybdenum ABC transporter permease
Z0935	19.28	23.65	541.16	550.45	25.4277	molybdenum ABC transporter ATP-binding protein ModC
Z0943	62.65	49.84	125.17	113.68	2.1233	putative acyl-CoA thioester hydrolase
Z0946	40.54	36.31	73.57	54.25	1.66324	integrase
Z1010	31.02	23.25	51.06	33.98	1.56698	hypothetical protein
Z1017	142.25	137.69	275.19	262.92	1.92223	ATP-dependent RNA helicase RhlE
Z1028	30.22	21	64.92	59.7	2.43303	23S rRNA (adenine(1618)-N(6))-methyltransferase RlmF
Z1031	457.34	291.16	635.07	551.21	1.58488	glutamine ABC transporter ATP-binding protein GlnQ
Z1032	493.14	334.16	686.75	688.15	1.66191	glutamine ABC transporter permease
Z1035	11.05	9.13	17.5	19.28	1.8226	threonine/homoserine exporter RhtA
Z1041	160.95	149.49	259.9	232.49	1.5861	L%2CD-transpeptidase
Z1042	88.59	85.21	191.54	166.78	2.06168	ABC-F family ATPase
Z1043	17.82	17.77	46.78	39.4	2.42147	DUF1479 domain-containing protein
Z1057	7.88	9.94	18.13	17.7	2.01066	EAL domain-containing protein
Z1061	59.73	49.18	131.87	132.1	2.42374	30S ribosomal protein S12 methylthiotransferase RimO
Z1062	3305.11	2274.69	4690.21	4573.82	1.66028	biofilm formation regulator BssR
Z1063	9	11.27	22.42	24.84	2.33152	PQQ-dependent sugar dehydrogenase
Z1068	8.31	6.69	19.53	17.59	2.47467	undecaprenyl-diphosphate phosphatase
Z1069	10.25	7.36	18.66	19.5	2.16695	multidrug efflux MFS transporter MdfA
Z1072	12.97	9.11	18.77	17.98	1.6644	MFS transporter
Z1074	32.79	34.87	64.07	59.23	1.82235	transporter
Z1081	13.18	13.37	25	24.81	1.87608	spermidine/putrescine ABC transporter substrate-binding protein PotF
Z1086	34.5	34.32	76.48	82.76	2.31386	23S rRNA (uracil(747)-C(5))-methyltransferase RlmC
Z1092	29.74	17.21	40.97	45.26	1.83663	arginine ABC transporter permease ArtQ
Z1094	188.95	145.87	423.88	388.07	2.42503	arginine ABC transporter ATP-binding protein ArtP
Z1102	73.99	70.39	146.09	143.12	2.00312	NAD(P)-dependent oxidoreductase
Z1108	45.75	40.33	74.26	75.73	1.74245	L-lysine exporter LysO
Z1112	63.74	64.69	119.9	111.46	1.80145	DUF535 domain-containing protein
Z1251	60.73	44.65	79.35	89.03	1.59784	30S ribosomal protein S12 methylthiotransferase accessory protein YcaO
Z1254	131.27	138.79	222.26	216.41	1.62434	3-phosphoshikimate 1-carboxyvinyltransferase
Z1256	156.03	137.43	311.1	245.34	1.89614	(d)CMP kinase
Z1260	50.51	47.24	90.29	92.1	1.86588	lipid A export ATP-binding/permease MsbA
Z1261	26.86	18.88	40.79	45.22	1.88041	tetraacyldisaccharide 4'-kinase
Z1265	58.68	58.33	177	165.16	2.92419	protein kinase-like domain protein
Z1278	312.92	295.33	466.09	489.91	1.57172	asparagine--tRNA ligase
Z1294	64.27	42.96	164.2	162.77	3.04924	quinone-dependent dihydroorotate dehydrogenase
Z1298	61.3	49.33	113.21	113.98	2.0536	bifunctional 23S rRNA (guanine(2069)-N(7))-methyltransferase RlmK/23S rRNA (guanine(2445)-N(2))-methyltransferase RlmL
Z1304	248.89	180.19	350.41	318.28	1.55843	bifunctional 3-hydroxydecanoyl-ACP dehydratase/trans-2-decenoyl-ACP isomerase
Z1305	160.73	157.94	274.51	277.89	1.73345	Lon protease family protein
Z1307	6252.91	6911.11	10761.2	11038.8	1.65603	porin OmpA
Z1311	30.48	25.89	57.66	59.62	2.08054	TIGR01666 family membrane protein
Z1319	41.77	30.78	75.7	75.21	2.08008	23S rRNA (cytosine(1962)-C(5))-methyltransferase RlmI
Z1387	20.34	24.46	43.32	36.15	1.77388	hypothetical protein
Z1389	1.21	1.08	16.67	10.51	11.869	hydrogenase 1 small subunit
Z1390	1.89	2.63	12.13	10.95	5.10619	Ni/Fe-hydrogenase large subunit
Z1401	72.95	57.58	192.94	184.89	2.89458	YjbH domain-containing protein
Z1402	31.26	29.15	116.32	100.09	3.58235	hypothetical protein
Z1403	166.34	161.49	499.81	460.59	2.92957	YjbF family lipoprotein
Z1405	47.14	81.79	145.22	87.76	1.80703	cold shock-like protein CspH
Z1406	453.38	908.77	1979.81	1706.83	2.70649	cold shock protein CspG
Z1409	13.34	8.56	17.95	16.62	1.57854	4Fe-4S binding protein
Z1410	2.79	2.91	14.61	14.73	5.14737	TMAO reductase system sensor histidine kinase/response regulator TorS
Z1411	4.71	4	18.13	16.63	3.99082	TMAO reductase system periplasmic protein TorT
Z1422	4.95	12.73	15	15.2	1.70814	hypothetical protein
Z1490	20.49	15.05	33.64	27.95	1.73298	hypothetical protein
Z1526	70.23	75.31	119.21	109.04	1.5683	poly-beta-1%2C6 N-acetyl-D-glucosamine export porin PgaA
Z1528	10.82	11.76	22.21	19.93	1.86625	cyclic diguanylate phosphodiesterase
Z1531	7.77	5.51	11.09	9.69	1.56476	transcriptional regulator
Z1669	48.84	61.72	86.88	90.29	1.60248	DUF1097 domain-containing protein
Z1681	9.94	8.25	19.87	19.86	2.18417	glucans biosynthesis protein MdoC
Z1683	183.18	168.08	335.36	302.05	1.81464	glucans biosynthesis protein MdoG
Z1684	125.63	108.38	178.35	177	1.51852	glucans biosynthesis glucosyltransferase MdoH
Z1685	12.86	24.41	46.36	49.74	2.57848	YceK/YidQ family lipoprotein
Z1695	2.4	6.01	12.13	8.19	2.41617	DUF2770 domain-containing protein
Z1699	72.95	54.89	138.36	124.27	2.05436	dihydroorotase
Z1707	39	34.89	64.66	66.8	1.77913	murein biosynthesis integral membrane protein MurJ
Z1722	382.1	347.15	625.16	523.78	1.57551	ribonuclease E
Z1725	61.7	63.01	137.63	131.92	2.16141	23S rRNA pseudouridine(955/2504/2580) synthase RluC
Z1729	121.45	118.95	209.14	196.99	1.68939	phosphate acyltransferase PlsX
Z1736	19.3	19.16	33.58	32.95	1.72985	cell division protein YceG
Z1737	102.97	95.35	160.04	151.63	1.57155	dTMP kinase
Z1738	51.75	51.4	82.59	83.28	1.60805	DNA polymerase III subunit delta'
Z1740	901.73	851.59	1627.64	1805.36	1.958	PTS glucose transporter subunit IIBC
Z1747	995.8	793.84	1549.21	1291.49	1.5873	alpha/beta hydrolase
Z1752	13.47	8.54	24.21	24.32	2.20491	L%2CD-transpeptidase LdtC
Z1757	42.87	48.8	76.81	79.64	1.70667	lipoprotein-releasing ABC transporter permease subunit LolC
Z1758	29.57	27.75	56.9	48.32	1.83566	lipoprotein-releasing ABC transporter ATP-binding protein LolD
Z1759	47.57	42.56	70.29	78.61	1.65206	lipoprotein-releasing ABC transporter permease subunit LolE
Z1763	41.29	42.61	69.02	61.95	1.56103	spermidine/putrescine ABC transporter permease PotC
Z1768	52.97	45.1	99.45	94.47	1.97736	hypothetical protein
Z1799	33.12	14.43	45.16	43.68	1.86835	TonB family protein
Z1800	4.32	6.61	11.04	14.35	2.32296	HNH endonuclease
Z1830	47.27	32.07	80.06	88	2.11823	spermidine/putrescine ABC transporter permease PotB
Z1831	96.74	83.42	234.18	206.61	2.44666	spermidine/putrescine ABC transporter ATP-binding protein PotA
Z1832	139.29	114.18	293.14	281.15	2.26571	peptidase T
Z1860	277.14	190.16	363.02	381.07	1.59232	adenylosuccinate lyase
Z1861	125.64	122.49	289.32	271.37	2.25966	lysogenization regulator HflD
Z1862	100.28	80.65	216.8	186.97	2.23164	tRNA 2-thiouridine(34) synthase MnmA
Z1863	18.07	17.02	34.99	26.59	1.75492	phosphatase NudJ
Z1879	5.22	5	18.53	14.56	3.23777	DUF1398 domain-containing protein
Z1883	8.08	6.78	11.38	12	1.57335	phage terminase large subunit family protein
Z1956	32.81	35.78	63.75	48.39	1.63493	membrane-bound lytic murein transglycosylase EmtA
Z1961	2.69	2.52	20.66	14.65	6.77735	TonB-dependent receptor
Z1962	1.72	1.13	71.26	55.27	44.3965	ModD protein
Z1963	1.4	3	224.36	244.05	106.457	methyltransferase domain-containing protein
Z1964	1.19	0.8	175.51	179.17	178.231	ABC transporter ATP-binding protein
Z1965	0.69	1.11	155.44	152.65	171.161	iron ABC transporter permease
Z1966	0.66	0.71	348.55	338.55	501.533	iron ABC transporter substrate-binding protein
Z1974	198.25	178.59	313.58	264.07	1.53288	redox-regulated ATPase YchF
Z1975	64.02	68.66	107.61	105.91	1.60929	aminoacyl-tRNA hydrolase
Z1977	11.62	13.03	21.56	23.25	1.81785	C4-dicarboxylic acid transporter DauA
Z1978	346.3	265.19	628.14	573.14	1.96451	ribose-phosphate pyrophosphokinase
Z1981	78.26	85.18	170.52	162.99	2.04057	glutamyl-tRNA reductase
Z1982	54.58	46.14	150.13	144.28	2.92305	peptide chain release factor 1
Z1983	26.11	20.02	69.7	80.96	3.26599	peptide chain release factor N(5)-glutamine methyltransferase
Z1984	2.87	3.69	9.89	13.89	3.625	SirB family protein
Z2010	32.75	32.58	53.01	55.06	1.65422	patatin-like phospholipase RssA
Z2011	32.38	32.81	59.63	55.3	1.763	two-component system response regulator RssB
Z2016	10534	12168.7	17548.2	16944.6	1.51932	bifunctional acetaldehyde-CoA/alcohol dehydrogenase
Z2020	44.1	35.34	110.04	110.6	2.77744	oligopeptide ABC transporter permease OppB
Z2021	39.09	43.79	97.3	106.05	2.45355	oligopeptide ABC transporter permease OppC
Z2022	29.48	31.02	71.28	71.46	2.35934	murein tripeptide/oligopeptide ABC transporter ATP binding protein OppD
Z2023	44.34	45.62	85.22	84.12	1.88239	murein tripeptide/oligopeptide ABC transporter ATP binding protein OppF
Z2032	130.15	117.17	217.32	198.36	1.68074	septation protein A
Z2034	170.9	161.69	1165.41	963.03	6.39959	outer membrane protein OmpW
Z2075	9.49	7.1	15.51	17.67	2	DUF1076 domain-containing protein
Z2100	8.92	6.45	16.28	17.2	2.17827	DUF968 domain-containing protein
Z2162	5.74	3.69	10.68	5.08	1.67126	YdeI family stress tolerance OB fold protein
Z2163	62.04	59.61	106.94	97.71	1.68229	diguanylate cyclase DgcZ
Z2171	20.75	13.91	39.66	36.94	2.21004	multiple antibiotic resistance transcriptional regulator MarR
Z2179	34.44	31.06	52.15	56.87	1.66443	glutaminase 2
Z2180	34.16	36.29	75.56	81.39	2.22782	DUF4186 domain-containing protein
Z2182	20.47	20.16	32.79	34.01	1.64411	GGDEF domain-containing protein
Z2184	10.72	5.33	18.2	16.56	2.16573	tagaturonate reductase
Z2189	3.86	7.33	11.09	9.14	1.80786	autoinducer 2 ABC transporter substrate-binding protein LsrB
Z2234	4.14	5.18	8.79	10.6	2.08047	formate dehydrogenase-N subunit gamma
Z2235	1.4	4.78	10.89	8.66	3.16343	formate dehydrogenase subunit beta
Z2236	10.88	8.97	42.07	40.79	4.17431	formate dehydrogenase-N subunit alpha
Z2238	25.45	23.18	53.05	41.79	1.95024	aromatic amino acid exporter YddG
Z2266	4.29	2.74	10.26	10.36	2.93314	L-asparagine permease
Z2268	14.7	14.5	24.98	20.37	1.55308	TonB-dependent receptor
Z2280	12.35	16.77	28.39	23.96	1.79773	PLP-dependent aminotransferase family protein
Z2284	33.75	29.23	76.77	75.74	2.42156	23S rRNA 5-hydroxycytidine C2501 synthase
Z2292	34.6	26.88	64.94	37.34	1.66363	DUF465 domain-containing protein
Z2294	65.88	61.15	107.94	110.28	1.71786	glucan biosynthesis protein D
Z2320	7.63	8.44	15.09	14.29	1.82825	DUF2773 domain-containing bactofilin
Z2321	11.79	8.01	24.73	21.95	2.35758	pyridoxine 4-dehydrogenase
Z2365	8.63	10.2	17.37	16.47	1.79713	terminase
Z2416	21.21	15.51	33.71	33.43	1.82843	tRNA 2-thiocytidine(32) synthetase TtcA
Z2417	33.01	32.75	59.39	67.49	1.92944	ATP-dependent RNA helicase DbpA
Z2423	5.46	4.79	12.65	9.82	2.1922	LysR family transcriptional regulator
Z2438	50.19	47.52	76.18	80.03	1.59871	peptide ABC transporter substrate-binding protein
Z2478	7.11	9.26	14	12.3	1.6066	phage shock protein PspD
Z2494	39.53	35.47	77.15	61.83	1.85307	peptide ABC transporter substrate-binding protein SapA
Z2496	11.91	11.52	20.11	22.29	1.80965	peptide ABC transporter permease
Z2498	9.24	9.1	12.91	18.15	1.69357	peptide ABC transporter permease SapC
Z2510	8.75	7.47	12.88	11.85	1.52466	TetR/AcrR family transcriptional regulator
Z2514	102.38	90.66	169.33	163.73	1.72534	exoribonuclease II
Z2516	6.65	6.46	10.02	9.94	1.5225	cyclic di-GMP phosphodiesterase
Z2524	10.35	8.51	16.16	15.41	1.67391	stress response translation initiation inhibitor YciH
Z2525	47.08	32.46	72.45	83.67	1.96279	orotidine-5'-phosphate decarboxylase
Z2532	47.6	48.46	78.88	74.05	1.59203	aconitate hydratase AcnA
Z2541	93.56	101.86	178.23	174.78	1.80642	23S rRNA pseudouridine(2605) synthase RluB
Z2542	12.89	13.67	21.98	20.88	1.6137	DUF2207 domain-containing protein
Z2550	138.23	961.26	1219.28	1175.55	2.17813	tryptophan synthase subunit beta
Z2551	111	647.18	1255.24	1215.78	3.25915	tryptophan synthase subunit alpha
Z2554	1.8	6.52	10.86	9.43	2.4387	ferritin-like domain-containing protein
Z2555	16.91	12.41	37.4	45.57	2.82981	ferritin-like domain-containing protein
Z2557	1.79	7.68	17.27	6.67	2.52798	outer membrane protein OmpW
Z2576	9.54	8.83	19.81	14.86	1.88732	dimethyl sulfoxide reductase subunit A
Z2577	10.22	7.44	10.31	17.5	1.57475	dimethylsulfoxide reductase subunit B
Z2579	6.47	7.22	11.27	9.58	1.52301	dimethyl sulfoxide reductase anchor subunit
Z2585	352.87	309.58	504.05	493.53	1.50589	ATP-dependent dethiobiotin synthetase BioD
Z2593	31.45	28.96	80.07	81.78	2.67919	multidrug/spermidine efflux SMR transporter subunit MdtI
Z2595	21.36	17.88	38.3	31.25	1.77243	AI-2 transporter TqsA
Z2605	7.26	6.04	26.19	28.4	4.10451	amino acid permease
Z2610	11.96	11.99	23.28	20	1.8071	two-component system sensor histidine kinase RstB
Z2615	20.69	21.3	34.07	35.2	1.64968	fumarate hydratase
Z2625	15.57	14.34	24.17	25.82	1.67135	Mal regulon transcriptional regulator MalI
Z2626	3.82	3.11	12.2	13.32	3.68254	PTS maltose transporter subunit IICB
Z2632	81.6	82.57	167.42	125.25	1.78273	DUF2569 domain-containing protein
Z2634	33.12	30.92	63.36	58.58	1.90412	electron transport complex subunit RsxB
Z2636	39.84	39.78	73.7	69.58	1.79955	electron transport complex subunit RsxC
Z2646	85.87	91.6	132.79	142.53	1.55136	dipeptide/tripeptide permease DtpA
Z2648	73.9	71.13	130.79	113.89	1.6871	pyridoxal kinase
Z2659	8.55	12.13	19.93	13.71	1.62669	HlyD family secretion protein
Z2666	8.09	9.88	16.58	16.1	1.81859	TetR/AcrR family transcriptional regulator
Z2671	43.18	34.73	82.76	73.57	2.00655	ribonuclease T
Z2678	711.39	575.59	991.64	1066.73	1.59938	superoxide dismutase [Fe]
Z2679	11.38	8.27	14.48	21.45	1.8285	MFS transporter
Z2681	77.74	74.76	155.89	175.23	2.17128	HTH-type transcriptional repressor PurR
Z2685	28.67	24.66	51.17	50.86	1.91318	Bcr/CflA family multidrug efflux MFS transporter
Z2690	24.71	23.77	38.8	35.08	1.52393	multidrug efflux MATE transporter MdtK
Z2743	222.76	198.81	313.4	330.51	1.52741	phenylalanine--tRNA ligase subunit alpha
Z2751	25.42	23.91	71.27	74.02	2.94527	DUF481 domain-containing protein
Z2757	8.59	11.05	17.62	15.99	1.7113	metal-dependent hydrolase
Z2781	43.34	33.13	84.75	65.06	1.95907	exodeoxyribonuclease III
Z2782	78.07	54.28	123.08	103.83	1.71447	TVP38/TMEM64 family protein
Z2783	24.46	15.88	64.88	67.38	3.27863	protein YdjY
Z2784	11.63	12.3	46.32	47.46	3.91893	TVP38/TMEM64 family protein
Z2785	13.36	11.68	30.86	25.25	2.24081	carboxymuconolactone decarboxylase family protein
Z2786	63.22	52.87	163.69	145.6	2.66423	ABC transporter substrate-binding protein
Z2787	13.95	11.18	34.41	32.06	2.64505	ABC transporter permease
Z2789	122.47	91.2	425.55	380.55	3.77264	sulfurtransferase
Z2801	69.55	65.66	126.24	113.79	1.77524	L-asparaginase 1
Z2802	44.46	39.2	73.36	69.19	1.70392	bifunctional nicotinamidase/pyrazinamidase
Z2812	5.19	4.52	10.12	10.66	2.14006	NAD(P)-dependent alcohol dehydrogenase
Z2815	3.77	2.47	11.26	9.07	3.25801	oxidoreductase
Z2816	120.67	117.88	232.87	171.18	1.69377	DUF1315 family protein
Z2825	6.19	6.23	18.96	20.49	3.17633	GGDEF domain-containing protein
Z2826	19.45	18.01	35.34	33.45	1.83636	GGDEF domain-containing protein
Z2829	34.83	47.91	62.24	71.42	1.61542	DUF441 domain-containing protein
Z2841	91.63	67.59	126	125.56	1.57995	leucine efflux protein LeuE
Z2848	17.6	13.42	29.5	28.59	1.87266	long-chain-fatty-acid--CoA ligase FadD
Z2849	17.06	16.42	33.65	28.51	1.85663	Slp family lipoprotein YeaY
Z2850	39.55	38.24	84.42	84.34	2.16943	tRNA (adenosine(37)-N6)-threonylcarbamoyltransferase complex dimerization subunit type 1 TsaB
Z2851	45.46	42.92	89.23	81.82	1.93539	ATP-dependent DNA helicase
Z2853	6.58	6.05	10.36	10.79	1.67458	DUF1889 family protein
Z2855	35.7	29.67	64.02	65.46	1.98073	aminodeoxychorismate synthase component 1
Z2856	31.76	43.88	62.01	55.14	1.54878	CoA pyrophosphatase
Z2857	65.95	52.65	123.67	111.63	1.98398	L-serine ammonia-lyase
Z2860	2039.13	2439.03	3901.74	3869.82	1.73544	PTS mannose transporter subunit IIAB
Z2861	1066.03	1277.92	1870.09	1865.85	1.59387	PTS mannose/fructose/sorbose transporter subunit IIC
Z2862	1637.93	2078.82	2804.78	2829.19	1.51583	PTS mannose transporter subunit IID
Z2863	18.93	32.68	50.8	46.67	1.88859	DUF986 domain-containing protein
Z2864	2.72	3.31	12.01	12.51	4.06633	manganese efflux pump MntP
Z2871	39.17	40.75	68	69.64	1.72222	hypothetical protein
Z2877	314.88	267.88	583.06	554.54	1.95209	carboxy terminal-processing peptidase
Z2878m	492.9	444.46	887.48	719.47	1.71434	RNA chaperone ProQ
Z2882	43.01	36.8	86.25	69.13	1.94687	16S rRNA (cytosine(1407)-C(5))-methyltransferase RsmF
Z2883	6.19	7.66	15.74	10.63	1.90397	DUF1480 family protein
Z2906	332.42	316.41	588.89	615.02	1.85551	pyruvate kinase
Z2908	19.1	18.56	43.12	44.21	2.31891	murein DD-endopeptidase MepM
Z2909	34.82	35.92	77.63	73.05	2.13005	zinc ABC transporter substrate-binding protein ZnuA
Z2911	17.65	14.01	27.29	35.27	1.97599	zinc ABC transporter permease subunit ZnuB
Z2919	318.15	294.37	512.6	505.99	1.66295	aspartate--tRNA ligase
Z2921	6.06	6.5	12.72	7.18	1.58439	DUF72 domain-containing protein
Z2924	54.32	48.42	81.24	89.89	1.66566	tRNA 5-methoxyuridine(34)/uridine 5-oxyacetic acid(34) synthase CmoB
Z2929	139.23	116.45	241.4	252.48	1.93163	arginine--tRNA ligase
Z2930	5.31	4.45	13.03	8.59	2.21516	lysozyme inhibitor LprI family protein
Z2945	84.17	85.46	205.64	201.32	2.3991	flagellar transcriptional regulator FlhC
Z2946	140.13	134.08	303.34	303.97	2.21476	flagellar transcriptional regulator FlhD
Z2962	18.33	15.63	45.34	31.07	2.25	DUF2492 family protein
Z2966	11.37	13.04	21.87	15.09	1.51413	integrase
Z2991	8.28	8.78	16.13	18.61	2.03634	phage tail sheath family protein
Z2993	30.64	30.51	48.25	47.88	1.57204	IS30-like element IS30 family transposase
Z2994	64.89	71.56	121.4	111.53	1.70707	hypothetical protein
Z3003	6.52	10.22	24.18	19.6	2.61529	DUF2594 family protein
Z3019	53.32	37.12	96.28	103.88	2.21318	selenium metabolism membrane protein YedE/FdhT
Z3020	47.25	34.64	112.92	88.41	2.45854	putative sulfurtransferase YedF
Z3053	12.69	12.84	20.46	19.4	1.5613	very short patch repair endonuclease
Z3060	35.28	32.4	57.99	45.28	1.52586	heavy metal sensor histidine kinase
Z3069	4.39	6.05	15.11	7	2.11782	hypothetical protein
Z3110	14.65	12.57	16.15	25.91	1.54519	tRNA-Arg
Z3133	19.3	6.37	34.77	13.82	1.89287	tRNA-Asn
Z3141	50.47	62.08	237.24	157.52	3.50742	tRNA-Asn
Z3149	8.91	23.88	49.09	45.6	2.88777	tRNA-Asn
Z3162	37.64	29.5	100.38	87.97	2.80533	IS3 family transposase;IS3 family transposase
Z3163	5.59	10.9	18.2	19.39	2.27956	DUF987 domain-containing protein
Z3164	30.88	28.2	82.98	76.84	2.70515	type IV toxin-antitoxin system toxin CbtA
Z3170	47.36	47.47	73.13	70.01	1.50944	DNA gyrase inhibitor SbmC
Z3176	73.8	42.29	110.94	119.93	1.98872	putrescine/proton symporter PlaP
Z3181	304.47	285.11	693.25	647.7	2.27442	ATP phosphoribosyltransferase
Z3189	72.9	68.28	116.82	102.65	1.55454	LPS O-antigen chain length determinant protein WzzB
Z3205	448.73	432.77	677.9	655.57	1.51273	UTP--glucose-1-phosphate uridylyltransferase GalF
Z3232	92.49	81.63	149.82	132.71	1.62262	outer membrane assembly protein AsmA
Z3233	95.76	81.28	132.74	147.05	1.58038	dCTP deaminase
Z3234	68.36	65.77	134.13	132.49	1.98777	uridine kinase
Z3244	6.36	6.31	10.65	10.09	1.63694	multidrug efflux RND transporter permease subunit MdtB
Z3250	16.07	13.24	56.61	46.65	3.52303	U32 family peptidase
Z3271	23.67	12.86	56.73	42.85	2.72598	hypothetical protein
Z3272	33.31	30.34	59.21	50.34	1.72113	outer membrane protein
Z3279	49.65	34.76	98.47	99.21	2.3419	hypothetical protein
Z3282	164.95	154.53	326.69	342.82	2.09562	methionine--tRNA ligase
Z3292	5.97	4.43	12.6	8.58	2.03654	hypothetical protein
Z3302	22.88	24.7	47.28	40.11	1.8367	two-component system response regulator BtsR
Z3303	22.55	22.03	58.17	55.75	2.55541	two-component regulatory system sensor histidine kinase BtsS
Z3362	28.64	24.49	43.99	46.47	1.70262	superinfection exclusion protein B
Z3381	106.83	92.66	170.25	147.28	1.59171	beta-glucosidase BglX
Z3389	6.05	7.51	17.82	16.23	2.51106	tRNA dihydrouridine(16) synthase DusC
Z3403	2.9	3.11	11.53	14.54	4.33777	galactose/methyl galactoside ABC transporter permease MglC
Z3405	7.23	4.6	36.1	31.64	5.72612	galactose/glucose ABC transporter substrate-binding protein MglB
Z3413	36.99	28.64	78.25	89.65	2.55828	lysine-specific permease
Z3428	16.8	16.58	44.58	38.82	2.4985	sugar efflux transporter SetB
Z3440	97.45	69.43	136.06	116.58	1.5139	hypothetical protein
Z3441	29.74	25.19	40.72	43.29	1.5294	multidrug efflux MFS transporter Bcr
Z3447	105	118.78	216.52	218.2	1.94262	cardiolipin transport protein PbgA
Z3450	47.7	32.67	79.88	76.33	1.94364	nitrate/nitrite response regulator protein NarP
Z3451	17.46	15.97	43.69	35.2	2.35986	cytochrome c-type biogenesis protein CcmH
Z3452	8.29	7.81	28.13	38.02	4.1087	thiol:disulfide interchange protein DsbE
Z3453	11.49	9.4	55.17	56.13	5.32791	heme lyase CcmF/NrfE family subunit
Z3454	19.74	11.09	74.48	60.38	4.37431	cytochrome c maturation protein CcmE
Z3456	45.1	40	155.86	155.53	3.65911	heme exporter protein CcmC
Z3457	17.36	19.34	58.14	55.44	3.09482	heme exporter protein CcmB
Z3458	41.22	36.45	121.06	121.34	3.1209	cytochrome c biogenesis heme-transporting ATPase CcmA
Z3459	41.91	44.74	174	171.71	3.98973	cytochrome c-type protein NapC
Z3460	34.85	25.81	138.86	143.75	4.65892	nitrate reductase cytochrome c-type subunit
Z3461	44.26	28.84	157.77	162.87	4.38632	quinol dehydrogenase ferredoxin subunit NapH
Z3462	76.34	62.05	223.55	245.48	3.38919	ferredoxin-type protein NapG
Z3463	104.92	71.12	414.93	388.68	4.56493	periplasmic nitrate reductase subunit alpha
Z3465	349.61	286.44	758.03	763.73	2.39252	ferredoxin-type protein NapF
Z3469	41.79	35.47	71.1	65.28	1.76521	microcin J25 efflux ABC transporter YojI
Z3472	7.69	8.48	15.6	20.49	2.23191	FAD:protein FMN transferase ApbE
Z3484	307.41	266.77	500.26	491.74	1.72768	DNA topoisomerase (ATP-hydrolyzing) subunit A
Z3486	119.52	103.58	189.83	189.98	1.70242	bifunctional 3-demethylubiquinone 3-O-methyltransferase/2-octaprenyl-6-hydroxy phenol methylase
Z3489	399.64	371.94	617.39	609.96	1.5907	ribonucleoside-diphosphate reductase subunit alpha
Z3495	11.42	10.6	23.52	26.76	2.28338	LysR family transcriptional regulator
Z3498	3.24	3.2	10.18	8.04	2.82919	glycerol-3-phosphate transporter
Z3499	6.16	4.75	22.14	18.57	3.73144	anaerobic glycerol-3-phosphate dehydrogenase subunit A
Z3511	10.19	12.73	21.41	18.88	1.75785	UDP-4-amino-4-deoxy-L-arabinose aminotransferase
Z3512	12.57	8.49	25.18	19.29	2.11159	undecaprenyl-phosphate 4-deoxy-4-formamido-L-arabinose transferase
Z3513	7.62	7.69	12.31	13.5	1.68583	bifunctional UDP-4-amino-4-deoxy-L-arabinose formyltransferase/UDP-glucuronic acid oxidase ArnA
Z3520	16.39	15.43	30.03	31.98	1.94877	o-succinylbenzoate--CoA ligase
Z3521	66.66	67.71	105.88	111.67	1.61904	o-succinylbenzoate synthase
Z3522	74.95	66.84	102.17	126.92	1.6157	1%2C4-dihydroxy-2-naphthoyl-CoA synthase
Z3523	12.63	9.4	53.45	49.39	4.66818	2-succinyl-6-hydroxy-2%2C4-cyclohexadiene-1-carboxylate synthase
Z3524	47.73	33.88	157.85	139.45	3.64294	2-succinyl-5-enolpyruvyl-6-hydroxy-3-cyclohexene-1-carboxylic-acid synthase
Z3525	63.2	70.76	144.04	128.59	2.03516	isochorismate synthase MenF
Z3534	78.15	68.29	105.76	117.4	1.5239	NADH-quinone oxidoreductase subunit NuoN
Z3536	145.55	115.29	223.71	238.3	1.77124	NADH-quinone oxidoreductase subunit M
Z3537	160.46	139.3	305.13	314.7	2.06775	NADH-quinone oxidoreductase subunit L
Z3538	35.37	21.96	42.07	51.99	1.64068	NADH-quinone oxidoreductase subunit NuoK
Z3539	176.23	178.75	332.16	359.32	1.94794	NADH-quinone oxidoreductase subunit J
Z3540	162.68	159.97	255.63	297.83	1.71536	NADH-quinone oxidoreductase subunit NuoI
Z3541	147.3	132.61	284.97	297.22	2.07992	NADH-quinone oxidoreductase subunit NuoH
Z3542	304.93	302.34	571.24	586.95	1.90721	NADH-quinone oxidoreductase subunit NuoG
Z3543	181.78	161.76	304.72	280.43	1.7033	NADH-quinone oxidoreductase subunit NuoF
Z3544	759.08	694.73	1332.22	1234.59	1.76557	NADH-quinone oxidoreductase subunit NuoE
Z3545	403.83	373.07	929.08	910.06	2.36728	NADH-quinone oxidoreductase subunit C/D
Z3546	349.16	332.29	671.21	668.57	1.96607	NADH-quinone oxidoreductase subunit B
Z3553	81.49	68.64	121.43	129.59	1.67202	SLC13 family permease
Z3558	934.68	837.51	1695.72	1583.67	1.85047	acetate kinase
Z3559	556.34	525.15	972.98	965.49	1.79241	phosphate acetyltransferase
Z3560	10.24	7.32	60.6	66.21	7.22153	putative basic amino acid antiporter YfcC
Z3573	22.17	19.74	37.9	28	1.57242	UbiX family flavin prenyltransferase
Z3574	212.33	92.45	414.6	419.29	2.73604	amidophosphoribosyltransferase
Z3575	24.45	11.88	54.04	51.54	2.90614	colicin V production protein
Z3577	42.41	39.37	67.86	75.06	1.74762	bifunctional tetrahydrofolate synthase/dihydrofolate synthase
Z3580	38.44	31.1	57.93	60.32	1.70046	tRNA pseudouridine(38-40) synthase TruA
Z3581	37.83	29.95	68.52	58.62	1.87577	aspartate-semialdehyde dehydrogenase
Z3583	42.02	45.67	78.97	78.34	1.79393	flagella biosynthesis regulator Flk
Z3585	3.92	4	10.55	12.83	2.95202	MFS transporter
Z3590	59.33	50.33	95.95	78.44	1.59028	membrane protein
Z3591	133.33	118.49	199.34	195.39	1.56751	penicillin-insensitive murein endopeptidase
Z3593	222.48	183.61	351.19	319.09	1.65057	50S ribosomal protein L3 N(5)-glutamine methyltransferase
Z3603	55.25	44.31	88.91	64.39	1.53978	phosphohistidine phosphatase SixA
Z3604	19.99	20.14	38.19	39.95	1.94717	fatty acid oxidation complex subunit alpha FadJ
Z3605	10.93	10.8	39.6	32.92	3.33732	acetyl-CoA C-acyltransferase FadI
Z3608	163.46	110.24	310.41	291	2.19733	long-chain fatty acid transporter FadL
Z3621	10.2	6.15	16.69	13.65	1.85566	hypothetical protein
Z3643	207.75	267.05	394.24	419.37	1.71358	kdo(2)-lipid IV(A) palmitoleoyltransferase
Z3660	57.39	56.73	98.3	110.58	1.83035	sensor domain-containing phosphodiesterase
Z3661	10.39	63.67	73.63	74.61	2.00162	tRNA-Ala
Z3665	271.92	263.75	430.3	446.08	1.63604	glutamate--tRNA ligase
Z3668	66.8	73.23	114.53	124.36	1.70599	tRNA-Val
Z3681	5464.06	5430.06	9693.08	8292.38	1.65093	phosphocarrier protein Hpr
Z3682	2039.08	1973	3011.31	3045.2	1.50957	phosphoenolpyruvate-protein phosphotransferase PtsI
Z3685	12.57	14.14	67.58	47.66	4.31449	hypothetical protein
Z3693	5.91	4.86	10.57	7.61	1.68802	N-acetylmuramic acid 6-phosphate etherase
Z3696	292.57	235.78	474.08	427.29	1.70601	porphyrinogen peroxidase
Z3697	66.79	52.51	118.2	85.87	1.71056	RpoE-regulated lipoprotein
Z3698	10.03	14.25	17.62	21	1.59061	DUF2919 domain-containing protein
Z3701	80.6	90.47	153.02	155.77	1.80505	oxygen-dependent coproporphyrinogen oxidase
Z3724	5.93	4.52	22.06	21.75	4.19234	oxidoreductase FeS-binding subunit
Z3726	29.38	28.73	70.91	66.18	2.35915	nitrate/nitrite two-component system sensor histidine kinase NarQ
Z3727	7.1	5.17	22.11	22.39	3.62673	multidrug efflux RND transporter permease AcrD
Z3731	46.02	56.58	74.24	79.94	1.50273	YpfN family protein
Z3762	38.15	18.18	84.31	87.61	3.05201	phosphoribosylformylglycinamidine cyclo-ligase
Z3763	104.34	81.6	215.76	192.94	2.19802	phosphoribosylglycinamide formyltransferase
Z3766	6.03	7.71	12.54	16.71	2.12882	cyclic-guanylate-specific phosphodiesterase PdeF
Z3772	195.33	125.1	318.18	348.47	2.08049	IMP dehydrogenase
Z3773	264.96	294.29	455.08	409.41	1.5458	exodeoxyribonuclease VII large subunit
Z3776	59.4	57.67	86.35	89.62	1.50312	tetratricopeptide repeat protein
Z3780	77.36	58.34	160.95	150.75	2.29698	bifunctional tRNA (adenosine(37)-C2)-methyltransferase TrmG/ribosomal RNA large subunit methyltransferase RlmN
Z3781	147.81	89.06	190.7	177.94	1.5563	nucleoside-diphosphate kinase
Z3783	4.67	4.86	11.16	11.63	2.3914	dimethyl sulfoxide reductase subunit C
Z3784	5.91	6.34	12.09	10.33	1.8302	dimethylsulfoxide reductase subunit B
Z3785	5.64	3.3	12.86	10.62	2.6264	dimethyl sulfoxide reductase subunit A
Z3786	7.36	7.58	12.37	13.48	1.73025	peptidoglycan glycosyltransferase PbpC
Z3797	124.05	146.47	205.97	201.47	1.50614	IscS subfamily cysteine desulfurase
Z3807	18.11	18.47	40.22	36.39	2.09431	3-phenylpropionate MFS transporter
Z3830	64.56	60.26	112.94	113.27	1.81229	two-component system response regulator GlrR
Z3831	126.88	129.62	218.13	200.03	1.63025	two-component system QseEF-associated lipoprotein QseG
Z3835	104.98	51.68	171.79	166.05	2.15652	phosphoribosylformylglycinamidine synthase
Z3838	6.59	5.67	10.98	11.6	1.84176	membrane-bound lytic murein transglycosylase MltF
Z3842	3.46	6.49	16.08	13.28	2.95075	4Fe-4S dicluster ferredoxin YfhL
Z3846	24.3	25.23	58.64	54.16	2.27741	DNA repair protein RecO
Z3847	128.63	124.05	287.03	298.58	2.3176	GTPase Era
Z3848	100.72	100.2	203.82	191.68	1.96845	ribonuclease III
Z3851	182.88	149.88	363.29	342.75	2.12177	elongation factor 4
Z3852	39.96	41.84	110.1	108.73	2.67518	SoxR-reducing system protein RseC
Z3853	243.31	213.64	492.46	480.41	2.12905	sigma-E factor regulatory protein RseB
Z3854	818.48	764.88	1327.65	1323.27	1.67424	anti-sigma-E factor RseA
Z3855	215.84	162.57	290.09	283.86	1.51674	RNA polymerase sigma factor RpoE
Z3857	30.27	29.34	50.34	44.54	1.59168	tRNA(1)(Val) (adenine(37)-N(6))-methyltransferase
Z3859	153.04	142.19	246.25	242.67	1.65606	ATP-dependent RNA helicase SrmB
Z3865	129.66	117.13	197.96	195.15	1.59289	tRNA/rRNA methyltransferase
Z3868	34.54	37.38	72.49	67.15	1.9416	DTW domain-containing protein
Z3869	63.34	58.83	101.29	93.25	1.59237	protein lysine acetyltransferase
Z3870	292.19	280.95	524.65	513.22	1.81085	CDP-diacylglycerol--serine O-phosphatidyltransferase
Z3871	51.18	36.59	79.64	69.04	1.69397	YfiM family lipoprotein
Z3874	6.81	5.21	16.08	14.48	2.54243	5S ribosomal RNA
Z3906m	54.5	57.76	125.65	109.49	2.0946	DUF21 domain-containing protein
Z3986	15.68	19.91	39.36	41.99	2.28575	multidrug efflux MFS transporter periplasmic adaptor subunit EmrA
Z3987	11.66	11.24	16.16	18.76	1.52489	multidrug efflux MFS transporter permease subunit EmrB
Z3992	136.26	136.69	306.84	249.58	2.03854	tRNA-Arg
Z3993	252	243.53	541	511.43	2.12385	tRNA-Arg
Z4004	28.67	28.3	61.26	64.3	2.20397	murein transglycosylase B
Z4014	127.66	104.75	198.16	185.77	1.65195	DNA-binding transcriptional repressor
Z4020	28.49	22.66	97.76	89.45	3.66002	carbamoyltransferase HypF
Z4024	8.23	6.71	11.45	11.28	1.52142	6-phospho-beta-glucosidase
Z4035	9.96	9.31	31.44	16.16	2.47016	hydrogenase maturation nickel metallochaperone HypA
Z4036	82.32	68.87	324.23	292.3	4.07785	hydrogenase nickel incorporation protein HypB
Z4037	15.7	8.86	47.26	38.47	3.49064	hydrogenase 3 maturation protein HypC
Z4038	139.56	97.91	586.56	577.95	4.90382	hydrogenase formation protein HypD
Z4039	58.69	49.06	224.62	236.62	4.28065	hydrogenase maturation carbamoyl dehydratase HypE
Z4040	25.67	20.6	113.42	106.38	4.75038	formate hydrogenlyase transcriptional activator FlhA
Z4043	64.11	46.18	97.07	79.81	1.60377	DNA mismatch repair protein MutS
Z4054	72.62	85.19	116.58	120.77	1.50402	2-C-methyl-D-erythritol 2%2C4-cyclodiphosphate synthase
Z4056	192	158.21	298.42	297.87	1.70266	cell division protein FtsB
Z4066	7.55	11.34	19.56	15.46	1.85389	type I-E CRISPR-associated protein Cas5/CasD
Z4069	5.41	6.19	10.14	9.94	1.73103	type I-E CRISPR-associated protein Cse1/CasA
Z4070	5.6	4.3	13.01	12.41	2.56768	CRISPR-associated helicase/endonuclease Cas3
Z4076	15.25	15.22	45.21	40.12	2.80046	FAD-dependent oxidoreductase
Z4077	6.92	6.95	15.48	6.04	1.55155	ferredoxin family protein
Z4078	11.16	16.59	24.83	23.52	1.74234	glycerol-3-phosphate responsive antiterminator
Z4095	456.97	431.41	750.61	771.38	1.71322	CTP synthase (glutamine hydrolyzing)
Z4107	26.94	19.47	41.69	50.7	1.99073	tRNA pseudouridine(65) synthase TruC
Z4108	15.04	14.3	25.44	26.41	1.76721	YqcC family protein
Z4113	60.34	38.73	95.91	102.16	1.99929	HAAAP family serine/threonine permease
Z4114	13.11	8.76	19.43	20.11	1.80796	L-serine ammonia-lyase
Z4116	6.77	9.27	13.93	11.97	1.61471	lactaldehyde reductase
Z4130	43.98	42.42	71.77	70.01	1.64097	murein transglycosylase A
Z4133	1.47	6.28	14.13	16.37	3.93548	tRNA-Met
Z4134	31.76	31.55	58.01	58.87	1.84615	N-acetylmuramoyl-L-alanine amidase
Z4150	19.91	22.03	47.46	42.65	2.14855	TerC family protein
Z4162	3.7	6.51	11.02	6.62	1.72772	2-dehydro-3-deoxy-D-gluconate 5-dehydrogenase KduD
Z4164	18.13	16.48	43.79	42.56	2.49494	acetyl-CoA C-acetyltransferase
Z4202	30.49	34.33	81.92	46.83	1.98627	tRNA-Gly
Z4208	44.14	42.91	87.2	86.06	1.99035	sigma-54-dependent transcriptional regulator
Z4214	4.93	3.42	13.77	12.66	3.16527	EF2563 family selenium-dependent molybdenum hydroxylase system protein
Z4215	3.8	5.81	27.82	28.19	5.8283	putative selenium-dependent hydroxylase accessory protein YqeC
Z4216	43.64	29.04	104.43	107.01	2.90919	molybdenum cofactor cytidylyltransferase
Z4228	291.03	237.5	487.09	494.49	1.85719	lysine--tRNA ligase
Z4229	288.61	294.08	576.3	566.96	1.96204	peptide chain release factor 2;peptide chain release factor 2
Z4240	183.9	134.62	263.17	258.26	1.63704	aminomethyl-transferring glycine dehydrogenase
Z4241	67.11	33.81	77.72	75.66	1.51982	glycine cleavage system protein GcvH
Z4242	189.26	138.11	365.95	317.25	2.08694	glycine cleavage system aminomethyltransferase GcvT
Z4258	10.91	6.48	15.84	15.78	1.81829	LysR family transcriptional regulator
Z4268	142.82	111.37	186.85	217.83	1.59204	ECF transporter S component
Z4269	70.27	59.64	145.56	143.28	2.22339	energy-coupling factor transporter transmembrane protein EcfT
Z4270	94.18	81.01	262.04	246.73	2.9041	energy-coupling factor ABC transporter ATP-binding protein
Z4271	70.05	56.74	208.62	197.48	3.20293	sulfate/molybdate ABC transporter ATP-binding protein
Z4283	157.27	129.18	287.36	302.34	2.05865	biosynthetic arginine decarboxylase
Z4284	27.35	32.99	65.94	53.3	1.97614	acid stress response protein YqgB
Z4287	190.95	126.64	333.48	328.86	2.08552	methionine adenosyltransferase
Z4290	50.19	43.57	131.51	121.48	2.69827	deoxyribonuclease I
Z4294	90.09	89.36	170.72	150.34	1.78913	Holliday junction resolvase RuvX
Z4297	20.1	17.28	26.04	30.19	1.50428	osmotic shock tolerance protein YggT
Z4298	57.38	60.28	105.76	94.91	1.70551	YggU family protein
Z4299	53.37	45.62	86.09	81.15	1.68946	XTP/dITP diphosphatase
Z4301	2.24	1.08	11.1	11.67	6.85843	DUF1202 family protein
Z4302	105.6	93.48	1268.73	1275.6	12.7804	L-asparaginase 2
Z4303	95.42	77.8	169.25	142.35	1.79887	DUF2884 family protein
Z4305	57.03	50.58	84.63	80.07	1.53053	tRNA (guanosine(46)-N7)-methyltransferase TrmB
Z4306	38.78	36.77	57.57	57.34	1.52098	A/G-specific adenine glycosylase
Z4310	17.85	13.65	32.96	31.91	2.05937	ornithine decarboxylase
Z4311	56.25	40.84	78.38	77.28	1.60325	DUF554 domain-containing protein
Z4344	67.05	86.48	308.38	250.94	3.64307	hydrogenase 2 maturation protein
Z4345	5.61	3.89	17.27	13.82	3.27263	hydrogenase maturation nickel metallochaperone HypA
Z4346	9	12.87	27.65	28.56	2.57019	hydrogenase-2 assembly chaperone
Z4347	12.08	11.49	27.63	31.4	2.50445	HyaD/HybD family hydrogenase maturation endopeptidase
Z4348	59.19	62.12	252.31	237.7	4.03932	hydrogenase 2 large subunit
Z4349	3.83	2.87	49.44	50.5	14.9164	Ni/Fe-hydrogenase cytochrome b subunit
Z4350	9.26	8.46	155.12	129.27	16.0491	hydrogenase 2 operon protein HybA
Z4351	22.28	17.62	154.05	152.59	7.68521	hydrogenase 2 small subunit
Z4352	0	0	43.72	33.18	#DIV/0!	DUF2623 domain-containing protein
Z4354	36.85	40.91	65.85	70.11	1.74846	L-glyceraldehyde 3-phosphate reductase
Z4362	134.69	114.93	205.36	182.66	1.55444	DedA family protein
Z4370	81.16	69.97	202.91	199.38	2.66188	YgiQ family radical SAM protein
Z4371	69.06	65.5	115.06	112.67	1.6924	cell division protein FtsP
Z4373	99.73	84.46	140.99	136.07	1.50421	DNA topoisomerase 4 subunit A
Z4387	70.92	59.88	125.06	132.47	1.96888	DNA topoisomerase IV subunit B
Z4388	133.56	144.89	206.45	214	1.50997	esterase YqiA
Z4398	77.19	60.84	201.79	174.41	2.72549	hypothetical protein
Z4408	67.22	48.7	300.11	236.41	4.62836	SH3 domain-containing protein
Z4410	86.19	74.77	126.32	127.24	1.5753	undecaprenyl-diphosphate phosphatase
Z4411	14.98	21.97	30.33	25.61	1.51394	bifunctional dihydroneopterin aldolase/7%2C8-dihydroneopterin epimerase
Z4412	49.11	51.68	96.83	99.58	1.94871	glycerol-3-phosphate 1-O-acyltransferase PlsY
Z4413	80.65	62.11	109.79	121.9	1.62293	DNA-binding transcriptional activator TtdR
Z4418	107.59	84.57	272.73	152.66	2.21373	30S ribosomal protein S21
Z4419	160.11	145.09	460.52	411.27	2.85645	DNA primase
Z4422	0	0	6.14	20.73	#DIV/0!	tRNA-Met
Z4437	37.11	33.2	98.16	87.46	2.64002	23S rRNA (guanine(1835)-N(2))-methyltransferase RlmG
Z4467	5.69	7.1	12.09	9.21	1.66536	propionate kinase
Z4480	7.54	5.7	17.3	13.76	2.34592	galactarate dehydratase
Z4514	37.35	34.6	74.57	74.74	2.07519	hypothetical protein
Z4519	121.65	91.34	381.88	376.09	3.55871	U32 family peptidase
Z4520	42.1	32.76	211.49	207.76	5.60045	U32 family peptidase
Z4523	411.15	362.17	653.41	667.31	1.70786	DEAD/DEAH family ATP-dependent RNA helicase
Z4530	355.35	306.84	563.04	518.57	1.63338	transcription termination/antitermination protein NusA
Z4531	138.96	126.59	254.26	259.87	1.93609	ribosome maturation factor RimP
Z4532	52.74	91.13	167.55	192.3	2.50122	tRNA-Met
Z4535	9.23	7.89	21.03	21.76	2.49942	phosphoethanolamine transferase
Z4539	36.01	28.93	58.77	53.31	1.7259	dihydropteroate synthase
Z4543	96.73	77.1	167.49	173.26	1.96025	transcription elongation factor GreA
Z4544	42.72	40.16	76.63	70.67	1.77727	serine-type D-Ala-D-Ala carboxypeptidase
Z4545	145.13	117.06	229.78	217.55	1.70613	GTPase ObgE
Z4546	105.11	80.53	236.69	226.66	2.49596	DMT family transporter
Z4552	146.57	135.86	238.58	243.2	1.70584	UDP-N-acetylglucosamine 1-carboxyvinyltransferase
Z4553	23.89	19.93	49.98	31.71	1.86422	BolA family iron metabolism protein IbaG
Z4556	55.39	42.96	95.74	86.18	1.84972	outer membrane lipid asymmetry maintenance protein MlaD
Z4557	32.71	29.36	55.58	48.01	1.66892	lipid asymmetry maintenance ABC transporter permease subunit MlaE
Z4569	22.31	25.7	43.27	42.31	1.78255	PTS phosphocarrier protein NPr
Z4575	13.22	12.62	46.13	46.3	3.57701	TIGR01212 family radical SAM protein
Z4606	39.12	36.25	73.27	62.05	1.79541	nucleoside triphosphate pyrophosphatase YhdE
Z4607	6.46	11.63	33.69	33.93	3.73798	rod shape-determining protein MreD
Z4609	45.68	44.93	125.17	128.51	2.79969	rod shape-determining protein MreC
Z4610	285.28	263.28	518.87	525.97	1.9047	rod shape-determining protein
Z4611	25.98	31.04	52.77	51.51	1.82883	RNase E specificity factor CsrD
Z4612	126	106.09	298.6	275.83	2.47503	oxidoreductase
Z4615	266.35	237.85	419.78	464.87	1.75456	acetyl-CoA carboxylase biotin carboxyl carrier protein
Z4618	10.8	11	21.41	21.62	1.97385	sodium/pantothenate symporter
Z4620	304.23	247.22	868.58	901.2	3.20932	tRNA dihydrouridine synthase DusB
Z4621	252.98	165.79	509.22	521.53	2.46137	DNA-binding transcriptional regulator Fis
Z4622	5.35	4.92	20.37	16.61	3.60078	adenine-specific DNA-methyltransferase
Z4623	5.01	4.7	23.32	16.92	4.14418	DUF2556 domain-containing protein
Z4628	1.02	3.81	11.9	8.51	4.22567	membrane protein
Z4645	6.61	6.93	13.2	9.12	1.64845	16S ribosomal RNA
Z4651	47.66	48.3	84.35	72.86	1.63829	DUF1488 domain-containing protein
Z4702	19.12	17.81	36.27	35.88	1.9537	sulfurtransferase complex subunit TusC
Z4713	103.32	92.92	164.13	153.57	1.61894	ABC transporter ATP-binding protein
Z4714	44.88	38.55	74.15	76.78	1.80906	hydrolase
Z4719	65.12	62.53	115.67	109.51	1.76404	transporter FUSC superfamily inner membrane protein
Z4720	16.91	15.66	27.12	31.74	1.80718	aspartate aminotransferase family protein
Z4721	53.41	44.19	82.13	80.62	1.66752	aminodeoxychorismate synthase component 2
Z4724	130.14	126.05	220.81	183.09	1.57656	peptidylprolyl isomerase A
Z4725	23.96	17.5	54.71	54.73	2.63965	MFS transporter TsgA
Z4728m	386.11	289.48	658.73	651.94	1.94004	nitrite transporter NirC
Z4729	236.71	184.9	486.67	476.61	2.28477	uroporphyrinogen-III C-methyltransferase
Z4730	4.03	5.76	19.43	13.13	3.32584	DUF4223 domain-containing protein
Z4742	283.85	273.84	531.54	531.14	1.9055	3-dehydroquinate synthase
Z4743	242.7	209.28	410.63	386.66	1.76399	shikimate kinase AroK
Z4750	36.77	32.93	82.01	81.81	2.35036	peptidoglycan glycosyltransferase/peptidoglycan DD-transpeptidase MrcA
Z4752	59.95	57.15	97	81.86	1.52741	intracellular growth attenuator protein IgaA
Z4753	112.14	105.07	196.1	157.76	1.62911	GMP/IMP nucleotidase
Z4759	67.29	61.16	100.06	112.08	1.65154	two-component system sensor histidine kinase EnvZ
Z4762	78.03	63.36	118.89	115.32	1.65648	RNA-binding transcriptional accessory protein
Z4764	657.5	618.34	1342.09	1370.69	2.12627	Fe(2+) transporter permease subunit FeoB
Z4765	92.82	72.49	196.75	182.55	2.29448	[Fe-S]-dependent transcriptional repressor FeoC
Z4766	15.27	15.83	29.88	26.28	1.80579	recombination-promoting nuclease RpnA
Z4771	41.34	39.17	121.89	110.7	2.88896	4-alpha-glucanotransferase
Z4772	73.94	63.32	171.15	167.39	2.46641	maltodextrin phosphorylase
Z4774	221.29	220.68	465.85	430.88	2.02894	HTH-type transcriptional regulator MalT
Z4781	97.5	101.85	194.14	189.41	1.924	DeoR/GlpR family transcriptional regulator
Z4784	23.35	26.21	51.25	51.31	2.06941	rhomboid family intramembrane serine protease GlpG
Z4802	5.05	3.01	10.44	7.58	2.23573	ATP-dependent DNA helicase RecQ
Z4838	65.49	66.67	104.97	93.3	1.50023	signal recognition particle-docking protein FtsY
Z4850	42.4	38.73	103.33	104.12	2.55701	methyltransferase domain-containing protein
Z4851	34.13	43.4	110.7	101.08	2.73159	hypothetical protein
Z4852	36.91	32.41	68.12	71.69	2.01688	1-acyl-sn-glycerol-3-phosphate acyltransferase
Z4854	25.52	13.92	43.18	32.5	1.91886	acyl carrier protein
Z4855	19.58	12.47	33.38	32.12	2.04368	hypothetical protein
Z4856	17.48	12.35	28.19	29.3	1.92725	acyl-CoA synthetase
Z4858	21.86	17.46	32.44	29.49	1.57503	glycosyltransferase
Z4860	10.05	6.99	18.72	13	1.8615	outer membrane lipoprotein carrier protein LolA
Z4867	108.02	116.66	204.6	172.34	1.67767	4'-phosphopantetheinyl transferase AcpT
Z4868	122.77	86.49	663.98	604.48	6.06165	nickel ABC transporter%2C nickel/metallophore periplasmic binding protein
Z4869	30.92	33.03	205.27	215.36	6.57748	nickel ABC transporter permease subunit NikB
Z4870	47.07	36.85	285.53	257.5	6.47081	nickel ABC transporter permease subunit NikC
Z4871	89.66	63.73	408.6	361.03	5.01747	nickel import ATP-binding protein NikD
Z4872	25.16	16.94	122.31	105.4	5.40879	nickel import ATP-binding protein NikE
Z4873	43.5	41.53	197.97	169.01	4.31589	nickel-responsive transcriptional regulator NikR
Z4876	20.4	24.02	31.97	35	1.50765	PTS sugar transporter subunit IIB
Z4884	121.54	129.69	198.68	181.46	1.51312	ABC transporter permease
Z4885	305.75	307.18	485.06	449.07	1.52404	ribosome-associated ATPase
Z4891	37.14	38.52	60.86	59.36	1.58895	NAD(P)/FAD-dependent oxidoreductase
Z4893	211.87	179.13	505.38	527.87	2.64258	Low-affinity inorganic phosphate transporter 1
Z4931	20.34	12.63	127.42	128.9	7.77434	cytochrome c peroxidase
Z4941	82.22	77.42	182.43	174.53	2.23603	insulinase family protein
Z4942	21.74	18.8	66.43	61.6	3.15812	dicarboxylate/amino acid:cation symporter
Z4954	115.23	122.35	197.63	189.84	1.6309	cellulose biosynthesis protein BcsG
Z4956	28.74	29.96	71	77.93	2.53714	transporter
Z4959	17.12	14.87	30.3	38.96	2.16505	dipeptide ABC transporter permease DppC
Z4960	15.71	16.13	35.2	35.42	2.21796	dipeptide ABC transporter permease DppB
Z4964	33.47	28.74	68.26	65.17	2.14483	kdo(2)-lipid A phosphoethanolamine 7''-transferase
Z4981	3587.29	4456.4	9202.12	7403.68	2.06445	RNA chaperone/antiterminator CspA
Z4983	266.72	233.37	394.6	391.69	1.5723	glycine--tRNA ligase subunit beta
Z4984	354.28	339.46	670.15	638.95	1.88702	glycine--tRNA ligase subunit alpha
Z4987	3.09	5.52	14.2	4.32	2.15099	YiaB family inner membrane protein
Z4997	192.43	215.82	372.72	382.03	1.84874	valine--pyruvate transaminase
Z4998	62.83	46.96	83.62	82.86	1.51635	4Fe-4S dicluster domain-containing protein
Z5010	12.14	12.71	29.14	21.97	2.05674	L-threonine dehydrogenase
Z5011	208.81	156.91	338.42	343.67	1.86506	selenocysteinyl-tRNA-specific translation elongation factor SelB
Z5031	7.99	10.12	17.8	15.27	1.82606	transcriptional regulator LldR
Z5039	1042.35	926.66	2370.48	2321.71	2.38302	2%2C3-bisphosphoglycerate-independent phosphoglycerate mutase
Z5040	72.93	82.73	156.04	131.51	1.8473	murein hydrolase activator EnvC
Z5041	32.2	26.59	79.01	70.56	2.54414	divergent polysaccharide deacetylase family protein
Z5048	121.9	121.71	197.86	193.42	1.60617	lipopolysaccharide heptosyltransferase RfaC
Z5049	102.92	96.86	180.64	175.89	1.78461	O-antigen ligase RfaL
Z5055	93.26	81.84	164.42	153.37	1.81491	glycosyltransferase family 1 protein
Z5056	203.9	205.29	352.7	350.54	1.71861	lipopolysaccharide core heptosyltransferase RfaQ
Z5057	64.35	70.15	154.22	149.47	2.25792	3-deoxy-D-manno-octulosonic acid transferase
Z5058	93.31	72.59	181.99	165.4	2.09397	pantetheine-phosphate adenylyltransferase
Z5059	22.98	16.58	41.26	33.84	1.89838	bifunctional DNA-formamidopyrimidine glycosylase/DNA-(apurinic or apyrimidinic site) lyase
Z5063	107.09	91.55	202.28	165.3	1.85048	bifunctional phosphopantothenoylcysteine decarboxylase/phosphopantothenate--cysteine ligase CoaBC
Z5064	190.5	178.02	339.51	341.75	1.84864	dUTP diphosphatase
Z5065	92.22	91.19	193.97	186.98	2.07704	nucleoid occlusion factor SlmA
Z5066	39.89	29.59	64.64	53.98	1.70725	orotate phosphoribosyltransferase
Z5068	91.89	82	223.94	188.94	2.37437	ribonuclease PH
Z5071	7.67	7.44	13.83	14.27	1.8597	trimeric intracellular cation channel family protein
Z5076	315.76	321.24	586.15	571.67	1.81761	bifunctional GTP diphosphokinase/guanosine-3'%2C5'-bis pyrophosphate 3'-pyrophosphohydrolase
Z5077	113.14	108.53	242.62	236.05	2.15938	tRNA (guanosine(18)-2'-O)-methyltransferase TrmH
Z5078	98.94	82.86	151.93	135.58	1.58146	ATP-dependent DNA helicase RecG
Z5082	20.67	10.17	60.75	63.82	4.03923	xanthine/proton symporter XanP
Z5086	54.63	50.94	96.53	66.32	1.54258	tRNA-Sec
Z5117	13.8	18.86	30.94	18.64	1.51806	type III secretion system LEE needle length regulator EscP
Z5155	4.66	5.34	11.26	11.41	2.267	adenine deaminase
Z5157	7.35	6.14	11.42	10.1	1.59526	MFS transporter family glucose-6-phosphate receptor UhpC
Z5158	10.51	5.71	27.92	24.73	3.24599	signal transduction histidine-protein kinase/phosphatase UhpB
Z5159	8.4	8.19	21.3	23.63	2.70826	transcriptional regulator UhpA
Z5165	47.49	36.75	77.4	69.14	1.73955	acetolactate synthase large subunit
Z5166	26.21	26.88	64.37	24.4	1.67207	ilvB operon leader peptide IvbL
Z5191	44.33	38.98	98.99	88.98	2.25627	DNA replication/repair protein RecF
Z5192	233.72	207.68	439.91	460.88	2.04076	DNA polymerase III subunit beta
Z5193	189.39	194.48	391.25	361.26	1.96033	chromosomal replication initiator protein DnaA
Z5194	174.42	148.44	272.29	269.61	1.67844	50S ribosomal protein L34
Z5195	43.25	35.96	133.42	108.51	3.05429	ribonuclease P protein component
Z5197	252.34	229.03	624.1	621.92	2.58849	membrane protein insertase YidC
Z5199	1.95	3.67	14.13	5.91	3.56584	hypothetical protein
Z5202	0	0	22.8	2.8	#DIV/0!	tryptophanase leader peptide
Z5203	7.33	4.61	29.09	24.84	4.51675	tryptophanase
Z5215	43.35	33.99	65.94	52.94	1.53711	phosphate signaling complex protein PhoU
Z5219	5.09	5.23	12.09	14.12	2.53973	phosphate ABC transporter substrate-binding protein PstS
Z5220	9.17	7.26	15.07	10.38	1.549	fimbrial protein
Z5236	1043.95	810.98	1658.75	1695.53	1.80831	F0F1 ATP synthase subunit A
Z5238	174.11	181.95	328.01	311.18	1.79517	F0F1 ATP synthase subunit I
Z5240	48.63	38.78	76.72	82.8	1.82496	16S rRNA (guanine(527)-N(7))-methyltransferase RsmG
Z5241	124.16	119	255.36	254.42	2.09648	tRNA uridine-5-carboxymethylaminomethyl(34) synthesis enzyme MnmG
Z5246	95.64	94.07	153.3	156.65	1.63381	ATPase RavA stimulator ViaA
Z5248	37.12	31.01	81.25	75.74	2.30427	low affinity potassium transporter Kup
Z5286	80.81	93.52	150.48	121.4	1.55957	peptidylprolyl isomerase C
Z5288	25.44	21.6	49.81	49.65	2.11437	DNA helicase Rep
Z5289	138.11	142	258.75	242.27	1.78865	guanosine-5'-triphosphate%2C3'-diphosphate diphosphatase
Z5293	1165.39	1209.33	1873.13	1759.22	1.52959	transcription termination factor Rho
Z5294	5.15	7.18	12.07	11.51	1.91241	hypothetical protein
Z5295	146.64	132.38	220.06	241.89	1.65562	UDP-N-acetylglucosamine--undecaprenyl-phosphate N-acetylglucosaminephosphotransferase
Z5296	67.34	63.78	119.66	119.56	1.82444	ECA polysaccharide chain length modulation protein
Z5297	135.46	115.2	227.59	219.78	1.78477	UDP-N-acetylglucosamine 2-epimerase (non-hydrolyzing)
Z5298	136.31	120.12	195.06	195.23	1.52201	UDP-N-acetyl-D-mannosamine dehydrogenase
Z5305	22.93	21.46	44.57	38.03	1.86078	O-antigen assembly polymerase
Z5312	4.4	1.57	14.13	5.46	3.28141	tRNA-Pro
Z5330	81.57	79.54	134.67	140.99	1.711	DNA helicase II
Z5342	77.02	74.67	145.97	134.34	1.84791	phospholipase A
Z5343	72.87	73.25	144.82	137.84	1.93444	ATP-dependent DNA helicase RecQ
Z5349	12.89	10.91	19.88	20.58	1.7	HTH-type transcriptional regulator MetR
Z5359	312.86	315.11	468.72	485.18	1.51902	Sec-independent protein translocase subunit TatB
Z5360	258.44	250.52	523.92	493.04	1.99811	Sec-independent protein translocase subunit TatC
Z5361	86.16	84.98	173.9	153.03	1.91031	3'-5' ssDNA/RNA exonuclease TatD
Z5373	8.57	9.65	18.2	16.49	1.90395	16S ribosomal RNA
Z5386	4.86	0	10.72	2.72	2.76543	5S ribosomal RNA
Z5391	92.24	89.23	145.2	153.1	1.6438	serine/threonine protein kinase
Z5393	3.94	3.72	10.97	7.93	2.46736	DUF945 family protein
Z5394	29.02	35.92	59.31	56.28	1.77995	acyltransferase
Z5402	77.88	69.68	125.39	112.26	1.61053	Der GTPase-activating protein YihI
Z5403	325.63	333.27	523.55	518.95	1.58218	oxygen-independent coproporphyrinogen III oxidase
Z5406	1339.04	928.91	2386.72	2233.39	2.03713	glutamate--ammonia ligase
Z5407	412.97	339.66	614.16	638.54	1.66443	ribosome-dependent GTPase TypA
Z5433	129.31	139.71	210.76	198.28	1.52048	formate dehydrogenase accessory protein FdhE
Z5434	42.75	38.81	146.39	165.94	3.82945	formate dehydrogenase cytochrome b556 subunit
Z5435	53.72	44.61	169.55	184.56	3.60124	formate dehydrogenase subunit beta
Z5436	291.15	279.35	898.69	867.43	3.09574	formate dehydrogenase-N subunit alpha
Z5460	1411.41	1332.17	3118.73	2732.31	2.13263	6-phosphofructokinase
Z5462	6.84	11	26.06	25.99	2.9176	sulfate ABC transporter substrate-binding protein
Z5470	74.32	57.8	160.2	169.52	2.49561	class II fructose-bisphosphatase
Z5472	15.87	12.16	25.35	25.2	1.80342	glycerol uptake facilitator protein GlpF
Z5477	18.01	17.88	31.36	35.68	1.86793	1%2C4-dihydroxy-2-naphthoate polyprenyltransferase
Z5479	158.92	137.61	244.13	242.06	1.6396	ATP-dependent protease subunit HslV
Z5480	127.15	137.74	238.17	203.9	1.66888	cell division protein FtsN
Z5481	78.84	88.32	163.92	150.15	1.87886	DNA-binding transcriptional regulator CytR
Z5482	25.5	28.22	54.92	54.01	2.02774	primosomal protein N'
Z5492	7.22	6.75	13.78	12.24	1.86256	YiiX family permuted papain-like enzyme
Z5495	50.17	49.97	79.28	71.22	1.5029	bifunctional aspartate kinase/homoserine dehydrogenase II
Z5497	885.7	768.76	2644.77	2515.41	3.11895	catalase/peroxidase HPI
Z5498	67.99	75.31	112.2	116.6	1.59665	cystine transporter YijE
Z5500	160.33	122.62	384.65	347.38	2.58714	bifunctional L-1%2C2-propanediol dehydrogenase/glycerol dehydrogenase
Z5516	25.14	26.36	48.56	45.14	1.81942	N-acetyl-gamma-glutamyl-phosphate reductase
Z5517	36.44	32.54	59.21	46.49	1.53233	acetylglutamate kinase
Z5526	46.52	38.46	95.58	81.36	2.08214	tRNA (uridine(54)-C5)-methyltransferase TrmA
Z5550	50.43	35.58	95.09	39.53	1.56517	tRNA-Tyr
Z5552	43.05	23.88	73.63	53.89	1.90527	tRNA-Thr
Z5554	453.31	431.31	759.37	758.34	1.71566	preprotein translocase subunit SecE
Z5571	26.96	31.89	46.79	47.08	1.59507	NAD(+) diphosphatase
Z5579	20.15	15.02	31.49	25.78	1.62838	two-component system sensor histidine kinase ZraS
Z5583	88.83	46.41	168.05	151.18	2.36047	bifunctional phosphoribosylaminoimidazolecarboxamide formyltransferase/IMP cyclohydrolase
Z5596	4.86	6.26	14.74	15.39	2.70953	5S ribosomal RNA
Z5612	113.63	68.38	328.67	299.67	3.45223	dipeptidase PepE
Z5620	47.94	49.33	111.28	96.35	2.13457	23S rRNA pseudouridine(2604) synthase RluF
Z5631	8.11	8.14	13.08	14.61	1.704	maltose ABC transporter permease MalF
Z5640	162.47	131.56	360.25	376.43	2.50546	glycerol-3-phosphate 1-O-acyltransferase PlsB
Z5643	22.32	21.74	40.89	35.61	1.73627	MATE family efflux transporter DinF
Z5644	40.83	35.14	65.14	52.01	1.54206	CsbD family protein
Z5647	54.89	51.87	91.94	88.62	1.69127	tRNA dihydrouridine(20/20a) synthase DusA
Z5648	39	24.89	63.33	48.83	1.75552	envelope stress response protein PspG
Z5650	130.42	129.01	246.99	232.72	1.84909	replicative DNA helicase DnaB
Z5654	47.72	48.46	80.98	75.45	1.62643	class B acid phosphatase
Z5657	128.84	105.98	186.05	193.77	1.61749	excinuclease ABC subunit UvrA
Z5658	99.79	87.86	162.67	154.68	1.69118	single-stranded DNA-binding protein SSB1
Z5663	26.99	11.2	31.32	34.62	1.72663	NCS2 family permease
Z5669	32.42	26.35	226.72	215.58	7.52595	ammonia-forming nitrite reductase cytochrome c552 subunit
Z5670	6.37	7.47	84.71	80.75	11.9552	cytochrome c nitrite reductase pentaheme subunit
Z5671	5.2	2.88	46.72	53.44	12.396	cytochrome c nitrite reductase Fe-S protein
Z5672	5.54	4.3	60.91	64.96	12.7917	cytochrome c nitrite reductase subunit NrfD
Z5673	3.94	2.32	27.13	24.56	8.25719	heme lyase CcmF/NrfE family subunit
Z5675	3.59	2.84	18.23	13.72	4.9689	heme lyase NrfEFG subunit NrfG
Z5678	30.51	22.13	158.11	160.99	6.06193	formate dehydrogenase N subunit alpha%2C selenocysteine-containing
Z5684	7.17	10.08	13.39	13.35	1.55014	response regulator transcription factor
Z5710	81.59	57.61	160.52	81.89	1.74145	phnA family protein
Z5711	21	22.8	33.26	33.78	1.53059	clamp-binding protein CrfC
Z5712	12.58	16.52	22.63	21.5	1.51649	hypothetical protein
Z5717	3.71	6.33	11.04	11.93	2.28785	arginine/agmatine antiporter
Z5720	20.97	19.3	39.33	39.97	1.96921	transcriptional regulator MelR
Z5724	10.14	10.43	43.32	40.55	4.0773	class I fumarate hydratase
Z5725	25.32	21.47	52.74	53.09	2.26181	anaerobic C4-dicarboxylate transporter
Z5730	78.63	43.59	108.33	100.42	1.70799	type V toxin-antitoxin system endoribonuclease antitoxin GhoS
Z5731	6.48	3.48	5.36	10.86	1.62851	type V toxin-antitoxin system toxin GhoT
Z5743	436.53	410.98	791.51	861.32	1.95022	anaerobic C4-dicarboxylate transporter
Z5744	1566.68	1347.79	3479.09	3494.81	2.39285	aspartate ammonia-lyase
Z5745	45.88	33.73	74.95	83.22	1.98681	membrane protein FxsA
Z5750	13.1	13.91	26.44	28.97	2.05146	hypothetical protein
Z5754	16.12	21.4	25.38	31.43	1.51413	lipoprotein toxin entericidin B
Z5757	25.17	22.62	96.09	86.68	3.82444	BlaEC family class C beta-lactamase
Z5758	62.36	37.64	140.32	143.81	2.8413	fumarate reductase subunit FrdD
Z5759	123.36	94.1	284.57	323.53	2.79638	fumarate reductase subunit FrdC
Z5760	393.09	335.95	1045.12	1068.28	2.89888	succinate dehydrogenase/fumarate reductase iron-sulfur subunit
Z5762	582.72	488.74	1413.45	1342.59	2.57223	fumarate reductase (quinol) flavoprotein subunit
Z5763	63.67	55.67	150.03	153.55	2.54382	elongation factor P--(R)-beta-lysine ligase
Z5765	34.11	34.47	54.1	53.93	1.57524	miniconductance mechanosensitive channel MscM
Z5766	133.3	96.88	295.31	227.15	2.26979	phosphatidylserine decarboxylase
Z5771	19.3	11.14	16.36	37.31	1.76314	tRNA-Gly
Z5772	50.47	50.94	108.4	103.63	2.09082	tRNA-Gly
Z5781	419.83	366.59	627.05	615.58	1.58011	FtsH protease activity modulator HflK
Z5784	1043.21	925.1	1560.23	1578.19	1.59447	adenylosuccinate synthase
Z5838	6.37	5.56	10.72	12.07	1.91031	galactofuranose ABC transporter substrate-binding protein YtfQ
Z5847	48.52	41.63	199.56	211.16	4.55596	anaerobic ribonucleoside-triphosphate reductase-activating protein
Z5848	192.19	191.68	833.21	814.87	4.29333	anaerobic ribonucleoside-triphosphate reductase
Z5857	11.7	4.48	23.03	3.89	1.66378	pyrBI operon leader peptide
Z5866	5.39	5.42	12.53	17.76	2.80204	ornithine carbamoyltransferase
Z5875	5.33	4.59	10.13	7.48	1.7752	DUF853 domain-containing protein
Z5894	34.44	22.9	51.11	40.62	1.59976	HNH endonuclease
Z5895	29.16	19.48	90.23	68.97	3.27303	OmpA family protein
Z5896	40.4	31.54	115.19	94.79	2.91882	membrane protein
Z5898	156.58	169.55	398.87	381.74	2.39355	DEAD/DEAH box helicase
Z5899	76.56	74.2	149.84	146.28	1.96418	DEAD/DEAH box helicase
Z5920	10.85	11.03	17.84	20.83	1.76737	mannonate dehydratase
Z5921	6.1	7.45	13.51	13.87	2.02066	fructuronate reductase
Z5925	65.16	57.87	100.46	90.32	1.55068	anti-adapter protein IraD
Z5936	1.03	2.05	22.06	26.94	15.9091	hypothetical protein
Z5937	4.8	5.78	82.31	83.68	15.689	2-hydroxyacyl-CoA dehydratase subunit D
Z5938	9.4	9.13	17.23	17.09	1.85213	DUF445 domain-containing protein
Z5939	37.6	30.22	72.23	62.51	1.98673	multidrug efflux MFS transporter MdtM
Z5943	4.6	5.49	15.16	14.76	2.96531	DUF262 domain-containing protein
Z5947	45.89	41.48	91.99	92.44	2.11091	restriction endonuclease EcoEI subunit M
Z5948	231.98	190.35	399.04	347.5	1.76767	DEAD/DEAH box helicase
Z5953	89.95	102.65	152.62	159.59	1.62103	carbon starvation protein A
Z5959	16.74	11.72	34.86	32.21	2.35664	phosphatidylglycerol--membrane-oligosaccharide glycerophosphotransferase
Z5960	32.14	30.8	59.03	59.19	1.8783	DUF2501 domain-containing protein
Z5961	45.55	40.65	77.72	61.61	1.61636	DNA replication protein DnaC
Z5963	19.52	16.85	37.06	38.77	2.08496	threonine/serine exporter
Z5964	137.25	98.38	210.07	200.22	1.74125	threonine/serine exporter ThrE family protein
Z5971	10.37	16.69	53.6	28.97	3.05137	tRNA-Leu
Z5972	98.28	96.48	221.56	226.51	2.30063	16S rRNA (guanine(1207)-N(2))-methyltransferase RsmC
Z5973	182.57	186.44	471.57	441.11	2.47332	DNA polymerase III subunit psi
Z5974	29.28	27.06	77.54	75.65	2.71903	ribosomal-protein-alanine N-acetyltransferase
Z5975	56.57	55.85	181.8	161.39	3.05275	pyrimidine 5'-nucleotidase
Z5976	91.39	67.11	192.29	192	2.42454	peptide chain release factor 3
Z5981	6.14	4.62	25.01	22.36	4.40242	YjjW family glycine radical enzyme activase
Z5982	113.69	93.99	443.26	388.57	4.00534	YjjI family glycine radical enzyme
Z5989	47.38	46.07	84.86	80.74	1.77207	phosphoserine phosphatase
Z5990	54.33	53.27	81.26	85.04	1.54554	DNA repair protein RadA

## Sheet: Excel file S3
Differently expressed LEE genes in rstA mutant compared with EHEC O157:H7 wild type strain
old_locus_tag	WT1_FPKM	WT2_FPKM	RSTA1_FPKM	RSTA2_FPKM	fold	Product
Z4180	0.92	0.49	2.33	1.43	2.66667	EscJ/YscJ/HrcJ family type III secretion inner membrane ring protein
Z4185	0.2	0.32	0	0.47	0.903846	EscU/YscU/HrcU family type III secretion system export apparatus switch protein
Z4187	0.44	0.32	0.4	1.23	2.14474	EscT/YscT/HrcT family type III secretion system export apparatus protein
Z4188	0	0	0	0	#DIV/0!	EscS/YscS/HrcS family type III secretion system export apparatus protein
Z4189	1.19	0.18	1.4	0.32	1.25547	EscR/YscR/HrcR family type III secretion system export apparatus protein
Z4190	1.14	0.86	1.42	0.53	0.975	YscQ/HrcQ family type III secretion apparatus protein
Z4193	0.24	0.52	1	1.57	3.38158	type III secretion protein
Z4195	0.82	0.7	0.45	1.02	0.967105	EscV/YscV/HrcV family type III secretion system export apparatus protein
Z4196	0.39	0.42	1.63	0.82	3.02469	YopN family type III secretion system gatekeeper subunit
Z4197	0.13	0.57	0.91	0.55	2.08571	EscC/YscC/HrcC family type III secretion system outer membrane ring protein
Z5100	288.91	400.68	388.9	376.19	1.10949	type III secretion system LEE effector EspF
Z5102	43.67	78.92	54.04	51.19	0.85839	type III secretion system LEE needle protein cochaperone EscG
Z5103	0.51	2.72	2.8	4.73	2.33127	type III secretion system LEE needle major subunit EscF
Z5104	177.24	230.69	165.72	158.29	0.794278	type III secretion system LEE chaperone CesD2
Z5105	1735.23	2487.9	1223.13	1057.63	0.540064	type III secretion system LEE translocon pore-forming subunit EspB
Z5106	1232.74	1762.12	786.71	705.13	0.498133	type III secretion system LEE translocon pore-forming subunit EspD
Z5107	2217.32	2950.96	1425.5	1439.17	0.554279	type III secretion system LEE translocon filament protein EspA
Z5108	344.11	372.45	266.42	238.07	0.704044	type III secretion system LEE gatekeeper SepL
Z5109	166.87	176.47	130.36	112.07	0.706093	type III secretion system LEE inner membrane ring protein EscD
Z5110	2010.03	2483.14	1114.43	1070.31	0.486236	intimin type gamma
Z5111	1172.22	1341.06	808.86	774.11	0.629842	type III secretion system LEE chaperone CesT
Z5112	1261.61	1650.8	1298.92	1174.56	0.84929	type III secretion system LEE translocated intimin receptor Tir
Z5113	1546.22	1692.74	1283.36	995.91	0.703704	type III secretion system LEE effector Map (Rho guanine exchange factor)
Z5114	2353.82	2276.89	1773.75	1743.66	0.759583	type III secretion system LEE chaperone CesF
Z5115	248.55	242.68	256.91	158.66	0.845978	type III secretion system LEE effector EspH
Z5116	154.72	184.37	195.9	190.47	1.13943	type III secretion system LEE ring protein EscQ
Z5117	13.8	18.86	30.94	18.64	1.51806	type III secretion system LEE needle length regulator EscP
Z5118	11.94	20.48	14.39	15	0.906539	type III secretion system LEE ATPase activity positive regulator EscO
Z5119	198.29	221.84	241.09	231.8	1.12558	type III secretion system LEE ATPase EscN
Z5120	141.3	138.58	194.68	173.99	1.31724	type III secretion system LEE export apparatus protein EscV
Z5121	55.77	71.77	69.38	50.73	0.941744	type III secretion system LEE chaperone CesL
Z5122	3211.45	3624.58	1813.94	1610.2	0.500896	type III secretion system LEE cytoprotective effector EspZ
Z5123	134.64	153.41	95.65	95.47	0.663496	type III secretion system LEE inner rod protein EscI
Z5124	828.29	1027.81	839.57	702.47	0.830796	type III secretion system LEE inner membrane ring protein EscJ
Z5125	1208.8	1336.36	1275.53	1220.09	0.980536	type III secretion system LEE switch protein SepD
Z5126	1038.57	1097.16	1382.46	1222.08	1.21951	type III secretion system LEE outer membrane ring protein EscC
Z5127	602.17	594.56	649.7	605.44	1.04881	type III secretion system LEE chaperone CesD
Z5128	1042.31	1004.66	761.79	731.54	0.729532	type III secretion system LEE transcriptional regulator GrlA
Z5129	844.89	831.58	657.68	556.97	0.724528	type III secretion system LEE GrlA-binding negative regulator GrlR
Z5131	26.3	32.95	31.15	16.7	0.807595	type III secretion system LEE muramidase EtgA
Z5132	28.91	28.67	35.04	31.26	1.15144	type III secretion system LEE export apparatus switch protein EscU
Z5133	35.14	42.51	52.41	44.6	1.24932	type III secretion system LEE export apparatus protein EscT
Z5134	2.51	2.69	4.03	2.72	1.29808	type III secretion system LEE export apparatus protein EscS
Z5135	47.26	41.44	41.12	36.61	0.876325	type III secretion system LEE export apparatus protein EscR
Z5136	205.21	247.87	202.11	170.34	0.82204	type III secretion system LEE stator protein EspL
Z5137	53.77	59.28	47.67	39.2	0.768421	hypothetical protein
Z5138	3.48	1.87	3.84	1.94	1.08037	type III secretion system LEE chaperone CesAB
Z5139	3.09	2.21	3.55	2.4	1.12264	type III secretion system LEE co-chaperone EscE
Z5140	233.15	201.32	161.41	89.93	0.578498	type III secretion system LEE master regulator Ler
Z5142	689.04	659.38	329.31	261.44	0.438105	type III secretion system LEE effector EspG

## Sheet: Excel file S4
Differently expressed acid tolerance genes in rstA mutant compared with EHEC O157:H7 wild type strain
old_locus_tag	WT1_FPKM	WT2_FPKM	RSTA1_FPKM	RSTA2_FPKM	fold	Product
Z2591	2.69	4.68	0.93	1.56	0.337856	acid shock protein
Z4921	2851.41	3091.85	2141.41	2221.33	0.734065	acid-activated periplasmic chaperone HdeB
Z4922	29388	29068.8	17892	14953.5	0.561877	acid-activated periplasmic chaperone HdeA
Z4923	2350.4	2786.77	1200.63	1191.98	0.465745	HdeD family acid-resistance protein
Z4925	1634.74	1494.16	1043.9	975.95	0.645546	acid resistance transcriptional activator GadE
Z4928	894.31	879.56	380.38	366.03	0.420781	acid resistance transcriptional activator GadW
Z4929	203.61	208.67	155.62	154.53	0.75228	DNA-binding transcriptional regulator GadX

## Sheet: Excel file S5
Differently expressed diguanylate cyclases genes in rstA mutant compared with EHEC O157:H7 wild type strain										Differently expressed phosphodiesterases genes in rstA mutant compared with EHEC O157:H7 wild type strain
old_locus_tag	WT1_FPKM	WT2_FPKM	RSTA1_FPKM	RSTA2_FPKM	fold	Product				old_locus_tag	WT1_FPKM	WT2_FPKM	RSTA1_FPKM	RSTA2_FPKM	fold	Product
Z1058	3.4	3	6.67	7.9	2.27656	GGDEF domain-containing protein				Z0569	56.15	64.43	47.9	49.56	0.80826	cyclic-guanylate-specific phosphodiesterase PdeB
Z1527	42.67	43.53	48.84	42.35	1.05789	GGDEF domain-containing protein				Z1528	10.82	11.76	22.21	19.93	1.86625	cyclic diguanylate phosphodiesterase
Z2163	62.04	59.61	106.94	97.71	1.68229	diguanylate cyclase DgcZ				Z2221m	3.46	4.21	2.25	3.13	0.701434	oxygen-sensing cyclic-di-GMP phosphodiesterase
Z2182	20.47	20.16	32.79	34.01	1.64411	GGDEF domain-containing protein				Z2516	6.65	6.46	10.02	9.94	1.5225	cyclic di-GMP phosphodiesterase
Z2825	6.19	6.23	18.96	20.49	3.17633	GGDEF domain-containing protein				Z2858	6.21	10.14	4.57	5.19	0.596942	cyclic diguanylate phosphodiesterase
Z2826	19.45	18.01	35.34	33.45	1.83636	GGDEF domain-containing protein				Z3435	50.57	46.15	62.99	57.33	1.244	cyclic di-GMP phosphodiesterase
Z2836	358.13	334.88	387.83	381.67	1.11037	diguanylate cyclase				Z3766	6.03	7.71	12.54	16.71	2.12882	cyclic-guanylate-specific phosphodiesterase PdeF
Z3235	11.59	12.65	16.67	14.52	1.28672	diguanylate cyclase				Z4939	0.44	1.42	0.81	0.96	0.951613	cyclic-guanylate-specific phosphodiesterase
Z3898	119.07	118.71	181.79	168.69	1.47397	diguanylate cyclase DgcN				Z5660	5.05	3.2	4.6	5.16	1.18303	c-di-GMP phosphodiesterase PdeC

## Sheet: Excel file S6
Differently expressed Stxs and Nle genes in rstA mutant compared with EHEC O157:H7 wild type strain
old_locus_tag	WT1_FPKM	WT2_FPKM	RSTA1_FPKM	RSTA2_FPKM	fold	Product
Z0985	26.91	25.53	22.66	17.45	0.764874	type III secretion system effector arginine glycosyltransferase NleB2
Z0986	11.36	11.7	11.11	11.32	0.97268	type III secretion system effector zinc metalloprotease NleC
Z1464	54.29	70.57	19.59	19.36	0.311949	Shiga toxin Stx2 subunit A
Z1465	148.75	152.35	84.63	82.45	0.554899	Shiga toxin Stx2 subunit B
Z1822	29.43	26.56	20.04	16.58	0.654045	type III secretion system effector E3 ubiquitin ligase NleL
Z3343	10346.8	10411.9	7790.23	7362.59	0.729951	Shiga toxin Stx1 subunit B
Z3344	672.84	615.24	487.95	388.93	0.680765	Shiga toxin Stx1 subunit A
Z4328	161.47	169.62	95.62	96.42	0.580024	type III secretion system effector arginine glycosyltransferase NleB
Z6024	136.89	212.4	91.78	86.72	0.511037	type III secretion system effector NleA

## Sheet: Excel file S7
Differently expressed regulatory genes in rstA mutant compared with EHEC O157:H7 wild type strain
old_locus_tag	WT1_FPKM	WT2_FPKM	RSTA1_FPKM	RSTA2_FPKM	fold	Product
Z0040	58.4	42.77	51.81	51.45	1.02066	carnitine metabolism transcriptional regulator CaiF
Z0073	20.41	18.86	21.4	24.49	1.16858	arabinose operon transcriptional regulator AraC
Z0079	38.9	37.05	37.76	39.56	1.01804	HTH-type transcriptional regulator SgrR
Z0086	17.07	19.97	14.97	10.45	0.686285	transcriptional regulator LeuO
Z0091	65.13	64.84	94.14	86.71	1.39147	transcriptional regulator MraZ
Z0107	316.01	329.93	557.21	476.76	1.60072	secA regulator SecM
Z0121	91.18	99.47	84.9	88.8	0.911094	beta-lactamase regulator AmpE
Z0174	5.94	5.54	11.95	8.89	1.81533	CdaR family transcriptional regulator
Z0187	255.9	217.91	393.36	397.93	1.67006	sigma E protease regulator RseP
Z0230	111.33	113.44	57.76	57.15	0.511234	LysR family transcriptional regulator
Z0309	249.49	282.8	235.11	227.38	0.868868	LexA family transcriptional regulator
Z0342	39.36	41.4	27.11	33.37	0.748886	LysR family transcriptional regulator
Z0346	9.43	13.53	11.24	11.98	1.01132	LysR family transcriptional regulator
Z0361	20.62	17.2	34.72	20.43	1.45822	ECP biosynthesis operon DNA-binding transcriptional regulator EcpR
Z0371	107.22	98.66	83.84	69.44	0.744511	LysR family transcriptional regulator
Z0400	172.1	209.45	81.95	69.12	0.395938	transcriptional regulator BetI
Z0405	23.97	22.2	31.52	25.92	1.2441	LysR family transcriptional regulator
Z0434	16.67	17.74	17.27	17.39	1.00727	transcriptional regulator CynR
Z0441	38.23	38.54	49.37	51	1.30741	LacI family DNA-binding transcriptional regulator
Z0463	27.04	27.08	41.94	38.84	1.49261	response regulator transcription factor
Z0497	23.71	28.4	25.46	24.2	0.952984	phosphate response regulator transcription factor PhoB
Z0514	139.14	128.24	121.93	127.42	0.932568	transcriptional regulator NrdR
Z0539	59.95	58.59	21.51	25.76	0.398768	transcriptional regulator BolA
Z0552	9.15	7.25	12.61	12.47	1.52927	SgrR family transcriptional regulator
Z0555	50.63	57.99	45.04	46.9	0.846437	Lrp/AsnC family transcriptional regulator
Z0562	15.31	5	6.88	8.36	0.750369	P-II family nitrogen regulator
Z0636	66.64	62.86	60.19	50.45	0.854363	HTH-type transcriptional regulator CueR
Z0709	22.93	21.58	27.27	29.94	1.28533	copper response regulator transcription factor CusR
Z0728	50.44	57.61	36.87	44.17	0.750023	LPS O-antigen length regulator
Z0754	103.76	67.11	89.25	84.57	1.01726	nucleoside diphosphate kinase regulator
Z0765	15.57	10.48	22.37	21.74	1.69328	two-component response regulator DpiA
Z0769	297.08	241.38	512.2	342.04	1.58645	transcription antiterminator/RNA stability regulator CspE
Z0774	6.15	6.97	10.1	13.21	1.77668	DNA-binding transcriptional regulator
Z0823	227.29	255.73	245.06	239.18	1.00253	DNA-binding transcriptional regulator NagC
Z0831	1850.46	1638.24	1458.39	1499.32	0.847797	ferric iron uptake transcriptional regulator
Z0836	969.05	972.28	1203.92	1175.34	1.22558	replication initiation negative regulator SeqA
Z0841	18.97	17.13	22.93	23.54	1.28726	two-component system response regulator KdpE
Z0867	96.11	69.91	172.66	170.21	2.06523	AbrB family transcriptional regulator
Z0931	130.12	123.43	139.87	138.69	1.09864	molybdenum-dependent transcriptional regulator
Z1016	36.77	34.57	37.24	27.35	0.905383	DNA-binding transcriptional regulator CecR
Z1039	13.02	9.56	9.96	9.87	0.878211	transcriptional regulator MntR
Z1059	29.4	25.3	22.14	23.55	0.835283	DNA-binding transcriptional regulator
Z1062	3305.11	2274.69	4690.21	4573.82	1.66028	biofilm formation regulator BssR
Z1073	19.54	20.5	19.39	19.56	0.972777	TetR/AcrR family transcriptional regulator
Z1234	609.65	529.14	475.1	400.11	0.768544	leucine-responsive transcriptional regulator Lrp
Z1410	2.79	2.91	14.61	14.73	5.14737	TMAO reductase system sensor histidine kinase/response regulator TorS
Z1412	28.65	28.98	20.19	17.88	0.660593	two-component system response regulator TorR
Z1447	260.68	233.93	178.05	154.11	0.671559	helix-turn-helix transcriptional regulator
Z1448	56.9	63.14	27.95	25.79	0.447684	transcriptional regulator
Z1512	33.37	33.13	32.84	21.36	0.815038	HTH-type transcriptional regulator RutR
Z1513	40.88	41.3	52.67	48.6	1.23229	trifunctional transcriptional regulator/proline dehydrogenase/L-glutamate gamma-semialdehyde dehydrogenase
Z1531	7.77	5.51	11.09	9.69	1.56476	transcriptional regulator
Z1673	15.6	11.71	16.47	11.94	1.04028	transcriptional regulator CsgD
Z1697	1979.78	1612.12	1178.27	1003.6	0.607442	biofilm formation regulator BssS
Z1859	258.87	276.89	185.04	186.9	0.694229	two-component system response regulator PhoP
Z1861	125.64	122.49	289.32	271.37	2.25966	lysogenization regulator HflD
Z1932	806.89	907.16	1049.56	883.11	1.12755	XRE family transcriptional regulator
Z1950	81.32	71.58	85.71	84.59	1.1138	fatty acid metabolism transcriptional regulator FadR
Z1992	24.42	23.04	21.53	11.37	0.693215	putative cation transport regulator ChaB
Z1996	244.34	239.55	209.87	203.41	0.854078	two-component system response regulator NarL
Z2011	32.38	32.81	59.63	55.3	1.763	two-component system response regulator RssB
Z2013	6231.22	5084.4	3489.43	3079.63	0.58053	DNA-binding transcriptional regulator H-NS
Z2090	2837.98	2679.78	1290.86	1046.53	0.423612	LexA family transcriptional regulator
Z2157	158.14	161.66	250.46	227.91	1.49584	GntR family transcriptional regulator
Z2164	56.58	63.65	52.61	50.3	0.855943	transcriptional regulator FtrA
Z2171	20.75	13.91	39.66	36.94	2.21004	multiple antibiotic resistance transcriptional regulator MarR
Z2177	8.31	9.46	10.93	12.03	1.29207	LysR family transcriptional regulator
Z2193	12.18	9.64	12.71	12	1.13245	transcriptional regulator LsrR
Z2285	46.22	34.24	48.92	44.2	1.15735	XRE family transcriptional regulator
Z2299	13.92	15.71	22.71	17.62	1.36112	LysR family transcriptional regulator
Z2423	5.46	4.79	12.65	9.82	2.1922	LysR family transcriptional regulator
Z2433	695.01	733.43	611.01	553.52	0.815246	fumarate/nitrate reduction transcriptional regulator Fnr
Z2439	13.41	11.56	9.15	7.12	0.651582	LysR family transcriptional regulator
Z2454	177.71	174.41	156.14	157.79	0.891543	transcriptional regulator TyrR
Z2461	29.25	28.7	33.92	27.33	1.05695	LacI family transcriptional regulator
Z2489	21.23	15.18	22.28	16	1.05136	HTH-type transcriptional regulator PuuR
Z2510	8.75	7.47	12.88	11.85	1.52466	TetR/AcrR family transcriptional regulator
Z2521	126.95	141.14	144.87	146.04	1.08512	DeoR/GlpR transcriptional regulator
Z2535	119.76	110.31	128.81	105.98	1.02052	HTH-type transcriptional regulator CysB
Z2609	45.77	43.9	0	0	0	two-component system response regulator RstA
Z2623	107.09	106.86	105.99	84.93	0.892358	TetR/AcrR family transcriptional regulator
Z2625	15.57	14.34	24.17	25.82	1.67135	Mal regulon transcriptional regulator MalI
Z2657	292.54	328.73	168.66	153.54	0.518615	transcriptional regulator SlyA
Z2666	8.09	9.88	16.58	16.1	1.81859	TetR/AcrR family transcriptional regulator
Z2682	23.58	25.03	17.49	13.06	0.628472	LysR family transcriptional regulator
Z2732	333.44	327.11	265.58	246.04	0.774536	posphoenolpyruvate synthetase regulatory kinase/phosphorylase PpsR
Z2765	21.14	15.21	16.96	14.08	0.85392	transcriptional regulator ChbR
Z2808	23.48	21.2	33.79	24.49	1.30439	DeoR/GlpR transcriptional regulator
Z2831	36.37	32.23	29.69	27.08	0.827551	AraC family transcriptional regulator
Z2842	12.94	15.58	15.14	14.55	1.04102	LysR family transcriptional regulator
Z2868	521.09	419.4	608.42	554.57	1.23658	transcription antiterminator/RNA stability regulator CspE
Z2874	120.65	121.29	166.43	139.09	1.26279	DNA-binding transcriptional regulator KdgR
Z2905	70.15	79.68	99.16	103.93	1.35547	MurR/RpiR family transcriptional regulator
Z2916	278.61	248.65	250.04	255.66	0.959109	YebC/PmpR family DNA-binding transcriptional regulator
Z2936	8.1	11.48	4.38	8.08	0.636364	two-component system response regulator
Z2945	84.17	85.46	205.64	201.32	2.3991	flagellar transcriptional regulator FlhC
Z2946	140.13	134.08	303.34	303.97	2.21476	flagellar transcriptional regulator FlhD
Z2969	61.56	54.96	70.23	52.9	1.05673	transcriptional regulator
Z3002	379.31	383.38	419.46	452.82	1.14369	two-component system response regulator UvrY
Z3004	148.55	132.36	99.11	98.33	0.702859	transcriptional regulator SdiA
Z3041	33.08	22.68	16.44	19.02	0.63594	transcriptional regulator RcsA
Z3047	38.8	42.04	37.32	35.5	0.900792	cellulose biosynthesis regulator YedQ
Z3061	11.75	9.18	11.1	5.78	0.806498	DNA-binding response regulator HprR
Z3126	1009.22	919.94	689.86	610.36	0.673982	LexA family transcriptional regulator
Z3140	208.16	156.25	196.19	168.87	1.00178	YebC/PmpR family DNA-binding transcriptional regulator
Z3147	31.83	26.88	21.84	20.59	0.722705	nitrogen assimilation transcriptional regulator
Z3177	38.58	39.68	37.27	30.26	0.862893	LysR family transcriptional regulator
Z3231	555.54	557.51	313.01	303.13	0.55356	XRE family transcriptional regulator
Z3248	55.08	57.9	64.07	43.72	0.954063	two-component system response regulator BaeR
Z3264	208.41	206.01	223.69	189.22	0.996356	GntR family transcriptional regulator
Z3302	22.88	24.7	47.28	40.11	1.8367	two-component system response regulator BtsR
Z3303	22.55	22.03	58.17	55.75	2.55541	two-component regulatory system sensor histidine kinase BtsS
Z3358	402.71	472.56	411.82	426.13	0.957362	LexA family transcriptional regulator
Z3376	10.61	12.75	12.62	12.27	1.0655	HTH-type transcriptional regulator MlrA
Z3395	12.66	13.31	13.17	11.09	0.934155	LysR family transcriptional regulator
Z3414	35.3	31.27	33.84	34.77	1.03064	LysR family transcriptional regulator
Z3450	47.7	32.67	79.88	76.33	1.94364	nitrate/nitrite response regulator protein NarP
Z3471	61.12	68.27	40.43	48.12	0.684365	bifunctional DNA-binding transcriptional regulator/O6-methylguanine-DNA methyltransferase Ada
Z3476	1509.22	1386.54	1019.05	951.25	0.680409	transcriptional regulator RcsB
Z3495	11.42	10.6	23.52	26.76	2.28338	LysR family transcriptional regulator
Z3549	131.2	127.68	171.99	196.72	1.42425	transcriptional regulator LrhA
Z3583	42.02	45.67	78.97	78.34	1.79393	flagella biosynthesis regulator Flk
Z3626	236.73	240.87	319.3	310.3	1.31826	LacI family DNA-binding transcriptional regulator
Z3631	254.8	247.47	265.13	237.69	1.0011	acid-sensing system DNA-binding response regulator EvgA
Z3646	72.75	73.74	97.07	78.44	1.1981	response regulator transcription factor
Z3647	62.19	50.34	66.12	54.1	1.06834	AraC family transcriptional regulator
Z3662	102.68	99.24	109.48	107.14	1.0728	putative DNA-binding transcriptional regulator
Z3663	192.33	225.34	255.11	243.43	1.19362	putative DNA-binding transcriptional regulator
Z3798	142.81	196.93	157.98	163.43	0.946047	Fe-S cluster assembly transcriptional regulator IscR
Z3829	202	203.06	182.95	174.71	0.88298	nitrogen regulatory protein P-II
Z3830	64.56	60.26	112.94	113.27	1.81229	two-component system response regulator GlrR
Z3841	92.09	78.52	93.19	86.21	1.05152	MurR/RpiR family transcriptional regulator
Z3853	243.31	213.64	492.46	480.41	2.12905	sigma-E factor regulatory protein RseB
Z3860	10.87	10.42	11.46	15.6	1.27102	LysR family transcriptional regulator
Z3963	18.89	20.98	23.21	18.06	1.03511	DNA-binding transcriptional regulator CsiR
Z3998	303.87	288.79	264.91	211.16	0.803277	carbon storage regulator
Z4001	12.61	16.42	17.06	15.93	1.13641	recombination regulator RecX
Z4013	10.03	13.44	12.52	11.67	1.03068	transcriptional regulator GutM
Z4017	10.2	11.26	7.8	8.6	0.764212	nitric oxide reductase transcriptional regulator NorR
Z4022	38.39	46.91	67.96	55.78	1.45064	LacI family DNA-binding transcriptional regulator
Z4048	23.23	14.53	11.05	8.24	0.510858	MarR family transcriptional regulator
Z4125	38.71	39.54	53.17	44.61	1.24958	transcriptional regulator GcvA
Z4155	220.49	206.09	148.96	151.01	0.703198	HTH-type transcriptional regulator GalR
Z4157	31.22	32.83	31.39	23.11	0.850898	LysR family transcriptional regulator
Z4167	10.17	14.34	17.65	16.47	1.39208	transcriptional regulator
Z4208	44.14	42.91	87.2	86.06	1.99035	sigma-54-dependent transcriptional regulator
Z4253	109.15	104.88	84.5	70.83	0.725739	LysR family transcriptional regulator ArgP
Z4258	10.91	6.48	15.84	15.78	1.81829	LysR family transcriptional regulator
Z4363	25.7	27.56	22.09	20.74	0.804168	AraC family transcriptional regulator
Z4375	12.61	13.53	13.19	9.78	0.87873	transcriptional regulator
Z4377	15.73	12.83	13.66	9.55	0.812675	two-component system response regulator QseB
Z4381	30.74	35.01	25.56	23.42	0.744943	MurR/RpiR family transcriptional regulator
Z4401	63.42	61.39	43.31	52.77	0.76981	cell surface composition regulator GlgS
Z4424	115.16	101.59	70.74	70.68	0.652457	PadR family transcriptional regulator
Z4428	88.28	71.8	110.1	91.35	1.25843	transcriptional regulator EbgR
Z4448	275.28	259.4	198.85	190.56	0.728305	transcriptional regulator ExuR
Z4459	23.39	21.71	25.99	24.47	1.11885	LysR family transcriptional regulator
Z4483	19.5	20.31	16.7	10.63	0.686511	DeoR family transcriptional regulator
Z4551	10.51	8.67	13.37	9.03	1.16788	DNA-binding transcriptional regulator SfsB
Z4567	376.28	375.73	303.92	310.13	0.816545	PTS IIA-like nitrogen regulatory protein PtsN
Z4570	178.93	140.09	172.38	157.77	1.03489	PhoP regulatory network protein YrbL
Z4584	448.41	503.78	341.1	325.25	0.699808	transcriptional regulator NanR
Z4596	1461.32	1244.48	1297.94	1253.47	0.942941	transcriptional regulator ArgR
Z4621	252.98	165.79	509.22	521.53	2.46137	DNA-binding transcriptional regulator Fis
Z4662	18.01	18.74	12.41	10.35	0.61932	Zn(2+)-responsive transcriptional regulator
Z4704	241.39	236.44	241	270.74	1.07097	transcriptional regulator
Z4718	1250.23	1251.47	929.67	1048.47	0.790718	cAMP-activated global transcriptional regulator CRP
Z4736	80.45	68.42	87.7	74.03	1.08638	transcriptional regulator PhoB
Z4760	117.99	108.55	131.69	121.79	1.11892	two-component system response regulator OmpR
Z4774	221.29	220.68	465.85	430.88	2.02894	HTH-type transcriptional regulator MalT
Z4781	97.5	101.85	194.14	189.41	1.924	DeoR/GlpR family transcriptional regulator
Z4806	280	295.41	276.54	231.11	0.88224	HTH-type transcriptional regulator GntR
Z4873	43.5	41.53	197.97	169.01	4.31589	nickel-responsive transcriptional regulator NikR
Z4874	11.78	9.72	8.74	9.56	0.851163	GntR family transcriptional regulator
Z4909	279.17	324.44	131.43	130.13	0.433326	helix-turn-helix transcriptional regulator
Z4929	203.61	208.67	155.62	154.53	0.75228	DNA-binding transcriptional regulator GadX
Z4934	46.5	44.76	31.78	22.99	0.600153	LysR family transcriptional regulator
Z4943	64.32	65.99	87.29	85.48	1.32584	biofilm formation regulator HmsP
Z4994	24.59	23.09	22.28	18.44	0.854027	xylose operon transcription regulator XylR
Z5004	106.68	87.85	99.96	87.03	0.96124	LysR family transcriptional regulator
Z5031	7.99	10.12	17.8	15.27	1.82606	transcriptional regulator LldR
Z5117	13.8	18.86	30.94	18.64	1.51806	type III secretion system LEE needle length regulator EscP
Z5118	11.94	20.48	14.39	15	0.906539	type III secretion system LEE ATPase activity positive regulator EscO
Z5128	1042.31	1004.66	761.79	731.54	0.729532	type III secretion system LEE transcriptional regulator GrlA
Z5129	844.89	831.58	657.68	556.97	0.724528	type III secretion system LEE GrlA-binding negative regulator GrlR
Z5140	233.15	201.32	161.41	89.93	0.578498	type III secretion system LEE master regulator Ler
Z5151	13.58	19.04	19.67	14.91	1.06009	DNA-binding transcriptional regulator
Z5159	8.4	8.19	21.3	23.63	2.70826	transcriptional regulator UhpA
Z5175	15.4	15.97	8	5.76	0.438636	AraC family transcriptional regulator
Z5206	40.54	47.51	46.79	46.93	1.0644	HTH-type transcriptional regulator YidZ
Z5244	31.95	36.64	30.48	29.06	0.868057	transcriptional regulator AsnC
Z5254	38.51	42.03	41.79	45.69	1.08617	transcriptional regulator RbsR
Z5258	215.05	179.29	153.87	154.11	0.781001	FadR family transcriptional regulator
Z5275m	204.01	227.85	123.42	122.77	0.570069	HTH-type transcriptional regulator HdfR
Z5349	12.89	10.91	19.88	20.58	1.7	HTH-type transcriptional regulator MetR
Z5357	260.35	243.36	285.11	287.91	1.1376	ubiquinone biosynthesis regulatory protein kinase UbiB
Z5362	22.61	20.29	30.2	32.64	1.4648	transcription/translation regulatory transformer protein RfaH
Z5422	32.87	34.02	39.55	37.94	1.15847	DeoR/GlpR transcriptional regulator
Z5457	331.83	316.38	253.5	241.58	0.763765	envelope stress response regulator transcription factor CpxR
Z5476	241.88	200.64	209.49	194.47	0.912863	ribonuclease E activity regulator RraA
Z5481	78.84	88.32	163.92	150.15	1.87886	DNA-binding transcriptional regulator CytR
Z5493	73.08	65.44	87.01	60.1	1.06201	met regulon transcriptional regulator MetJ
Z5512	50.85	49.7	61.48	50.78	1.11646	AraC family transcriptional regulator
Z5519	533.59	537.43	415.34	398.43	0.759808	DNA-binding transcriptional regulator OxyR
Z5580	36.58	36.59	37.39	39.2	1.04674	sigma-54-dependent response regulator transcription factor ZraR
Z5661	193.94	150.11	75.32	66.77	0.412992	superoxide response transcriptional regulator SoxS
Z5684	7.17	10.08	13.39	13.35	1.55014	response regulator transcription factor
Z5715	96.79	94.76	92.94	85.23	0.930149	two-component system response regulator BasR
Z5720	20.97	19.3	39.33	39.97	1.96921	transcriptional regulator MelR
Z5726	72.08	74.77	84.63	73.8	1.07886	two-component system response regulator DcuR
Z5736	50.21	36.55	55.25	52.4	1.24078	transcriptional regulator CadC
Z5740	700.98	735.96	747.77	717.95	1.02003	transcriptional regulator
Z5800	61.63	58.09	44.62	43.62	0.737053	HTH-type transcriptional regulator UlaR
Z5823	10.66	13.02	8.57	6.89	0.652872	transcriptional regulator
Z5851	60.93	70.95	75.59	56.72	1.00326	HTH-type transcriptional regulator TreR
Z5855	133.57	155.81	36	37.28	0.253231	aspartate carbamoyltransferase regulatory subunit
Z5888	82.73	79.35	46.46	49.68	0.593164	XRE family transcriptional regulator
Z5910	261.18	216.68	265.5	228.31	1.03338	type 1 fimbriae regulatory protein FimB
Z5922	176.22	172.41	157.65	106.37	0.757307	Uxu operon transcriptional regulator
Z5926	11.01	11.54	14.32	11.98	1.1663	HTH-type transcriptional regulator
Z5957	43.65	37.15	58.44	51.99	1.36671	GntR family transcriptional regulator
Z5987	33.33	30.7	46.51	42.56	1.39107	XRE family transcriptional regulator
Z5991	50.87	46.12	51.18	49.74	1.04052	multifunctional transcriptional regulator/nicotinamide-nucleotide adenylyltransferase/ribosylnicotinamide kinase NadR
Z6001	110.69	100.12	128.63	120.84	1.18339	two-component system response regulator CreB
Z6004	1922.09	1716	2041.7	1920.85	1.08918	two-component system response regulator ArcA
